1 **Genome-wide signals of drift and local adaptation during rapid lineage divergence**  
2 **in a songbird**

3

4 Running title: Drift and selection in a songbird radiation

5

6 Guillermo Friis,<sup>1</sup> Guillermo Fandos,<sup>2</sup> Amanda Zellmer,<sup>3</sup> John McCormack,<sup>3,4</sup> Brant

7 Faircloth,<sup>5</sup> Borja Milá<sup>1</sup>

8

9 *<sup>1</sup>National Museum of Natural Sciences, Spanish National Research Council (CSIC),*

10 *Madrid 28006, Spain; <sup>2</sup>Department of Biodiversity, Ecology and Evolution,*

11 *Complutense University of Madrid, Madrid 28040, Spain; <sup>3</sup>Department of Biology,*

12 *Occidental College, Los Angeles, CA 90041, USA; <sup>4</sup>Moore Laboratory of Zoology and*

13 *Department of Biology, Occidental College, Los Angeles, CA 90041, USA; <sup>5</sup>Department*

14 *of Biological Sciences and Museum of Natural Science, Louisiana State University,*

15 *Baton Rouge, LA 70803, USA*

16

17 Corresponding author: Guillermo Friis, National Museum of Natural Sciences - CSIC,

18 José Gutiérrez Abascal 2, Madrid 28006, Spain; Email: [gfriis@mncn.csic.es](mailto:gfriis@mncn.csic.es); Tel: +34

19 914111328 x1266.

20

21

22 **Abstract**

23 The formation of independent evolutionary lineages involves neutral and selective  
24 factors, and understanding their relative roles in population divergence is a fundamental  
25 goal of speciation research. Correlations between allele frequencies and environmental  
26 variability can reveal the role of selection, yet the relative contribution of drift can be  
27 difficult to establish. Recently diversified systems such as that of the Oregon junco  
28 (Aves: Emberizidae) of western North America provide ideal scenarios to apply  
29 genetic-environment association analyses (GEA) while controlling for population  
30 structure. Genome-wide SNP loci analyses revealed marked genetic structure consisting  
31 of differentiated populations in isolated, dry southern mountain ranges, and more  
32 admixed recently expanded populations in humid northern latitudes. We used  
33 correlations between genomic and environmental variance to test for three specific  
34 modes of evolutionary divergence: (i) drift in geographic isolation, (ii) differentiation  
35 along continuous selective gradients, and (iii) isolation by adaptation. We found  
36 evidence of strong drift in southern mountains, but also signals of local adaptation in  
37 several populations, driven by temperature, precipitation, elevation and vegetation,  
38 especially when controlling for population history. We identified numerous variants  
39 under selection scattered across the genome, suggesting that local adaptation can  
40 promote rapid differentiation over short periods when acting over multiple independent  
41 loci.

42 *Key words:* local adaptation, isolation by adaptation, drift, selective gradients,  
43 redundancy analysis, postglacial expansion

## 44 **Introduction**

45 Lineage diversification involves both selective and neutral factors, and elucidating their  
46 relative strengths and interactions in the process of evolutionary divergence is essential  
47 to understand the mechanisms underlying the early stages of speciation (Coyne and Orr  
48 2004; Nosil 2012). Lineage differentiation can be driven by divergent natural selection  
49 (Darwin 1859; Coyne and Orr 2004), a mechanism that is at the core of ‘ecological  
50 speciation’ models, in which reproductive isolation arises as a by-product of  
51 cumulative, ecologically adaptive changes (Mayr 1947; Schluter 2000; Rundle and  
52 Nosil 2005). In turn, accumulation of genetic differences caused by drift in geographic  
53 isolation or in isolation-by-distance (IBD, Wright 1943; Wright 1946) has been  
54 proposed as a mode of divergence driven by neutral factors (Mayr 1954, 1963), a  
55 mechanism that can be particularly strong in populations of small effective size (e.g.  
56 Carson 1975; Templeton 1981; Uyeda et al. 2009). Selection and drift can also act  
57 jointly and even interact during evolutionary divergence in a number of ways.  
58 Geographic distance usually implies environmental differences that may drive  
59 adaptation to local conditions and ecological differentiation, even if populations are  
60 connected by moderate gene flow (Schluter 2000; Rundle and Nosil 2005). The  
61 evolution of local adaptation can in turn result in isolation-by-adaptation (IBA), a mode  
62 of divergence where adaptive changes lead to intrinsic barriers to gene flow, enabling  
63 genome-wide differentiation at both neutral and selected loci (Nosil et al. 2008; Funk et  
64 al. 2011). Consequently, geographic distance and ecological divergence may promote  
65 similar patterns of genetic diversity among populations, so that teasing apart the roles of  
66 neutral evolution and ecological adaptation in evolutionary diversification requires  
67 approaches that account for both environmental heterogeneity and neutral population

68 structure (Wang and Bradburd 2014; Frichot et al. 2015; Rellstab et al. 2015; Forester et  
69 al. 2016).

70

71 Our capacity to assess the relative roles of adaptation and neutral differentiation in  
72 driving population divergence has benefitted from our increased ability to survey  
73 genome-wide variation thanks to the development of next generation sequencing (NGS)  
74 techniques (McCormack et al. 2013; Faria et al. 2014). The increasingly large number  
75 of loci afforded by NGS provides improved resolution to detect neutral population  
76 structure and patterns of gene flow among differentiated lineages. In addition, highly  
77 differentiated loci identified as outliers in an  $F_{ST}$  distribution can be interpreted as  
78 potential targets of divergent selection standing out in a background of balanced or  
79 neutrally maintained genomic variation (Faria et al. 2014; Rellstab et al. 2015).

80 However, methods of outlier detection relying solely on allele frequencies are sensitive  
81 to the confounding effects of historical factors, such as past sudden changes in  
82 population size or strong drift in small populations that may result in high rates of false  
83 positives (Edmonds et al. 2004; Kawecki and Ebert 2004; Billiard et al. 2005; Christmas  
84 et al. 2016). Moreover, changes in allele frequencies due to local adaptation can  
85 sometimes go undetected by outlier analyses (Pritchard and Di Rienzo 2010; Bierne et  
86 al. 2011; Rellstab et al. 2015; Forester et al. 2017). Alternative approaches that integrate  
87 environmental parameters by identifying allele frequencies that correlate with  
88 ecological variability have proven useful to detect signals of adaptation, especially when  
89 selective forces are weak (Frichot et al. 2015; Rellstab et al. 2015; Forester et al. 2017).  
90 These methods, known as genetic-environment association (GEA, Hedrick et al. 1976;  
91 Mitton et al. 1977) analyses, have the potential to reveal genetic patterns of  
92 differentiation due to local adaptation while testing for the role of multiple, specific

93 environmental variables as drivers of selection (Forester et al. 2017). Importantly, GEA  
94 methods can correct for population history by controlling for general patterns of neutral  
95 genomic variation (Rellstab et al. 2015; Forester et al. 2016), allowing us to separate the  
96 respective effects of drift and selection in generating and maintaining variability. GEA  
97 analyses have greatly benefitted from the development of high-throughput sequencing  
98 techniques, resulting in a number of studies focusing on the genomic variability  
99 associated with environmental parameters in groups as diverse as plants (Lasky et al.  
100 2012; Jones et al. 2013; De Kort et al. 2014; Nadeau et al. 2016; Sork et al. 2016),  
101 fungus (Ojeda Alayon et al. 2017), wolves (Forester et al. 2017) and birds (Manthey and  
102 Moyle 2015; Safran et al. 2016; Szulkin et al. 2016; Termignoni-García et al. 2017).

103

104 Recently diversified systems provide an ideal scenario for studying the relative roles of  
105 selective and neutral factors in incipient divergence and speciation. Specifically, GEA  
106 methods are particularly suitable when the system under study (i) is composed of  
107 closely related populations, among which the signals of selection are still recent and  
108 detectable; (ii) includes broad geographic distributions encompassing heterogeneous  
109 habitats across ecological clines (*i.e.* selective gradients) but also spatially  
110 discontinuous habitats so that adaptive and neutral divergence can be assessed in  
111 different spatial settings; (iii) shows large variability in the degree of geographical  
112 isolation among populations, from extensive gene flow to total isolation; and (iv)  
113 presents low variability in secondary sexual traits so that differential sexual selection  
114 can be ruled out as a major driver of population divergence.

115

116 The Oregon junco complex (*Junco hyemalis oregonus*) of western North America  
117 provides a particularly well suited system to carry out genome-environment association

118 analysis. The complex originated recently as part of the postglacial radiation of dark-  
119 eyed juncos across North America following a northward recolonization of the  
120 continent as ice sheets retreated after the last glacial maximum, c.a. 18,000 years ago  
121 (Milá et al. 2007; Friis et al. 2016; Milá et al. 2016). Among dark-eyed junco forms, the  
122 Oregon junco group presents the highest variability in terms of phenotype and  
123 ecological range, encompassing a broad latitudinal range from Baja California to Alaska  
124 (Fig. 1A). All forms of the Oregon junco share a characteristic dark hood, yet there is  
125 considerable population variation in plumage color, mainly of the hood, dorsum and  
126 flanks, and the complex has been traditionally divided into at least 7 subspecific forms  
127 (Dwight 1918; Miller 1941; Nolan et al. 2002), which include, from south to north:  
128 *townsendi*, from the San Pedro Mártir mountains in northern Baja California, Mexico;  
129 *pontilis*, distributed just north of *townsendi* in the Sierra Juárez mountains, also in Baja  
130 California, Mexico; *thurberi*, from the mountains of southern California and Sierra  
131 Nevada; *pinosus*, a coastal form from central California, predominantly distributed in  
132 the Santa Cruz mountains; *montanus*, distributed across the interior of Oregon,  
133 Washington and British Columbia; *shufeldti*, a more coastal form from Oregon and  
134 Washington; and *oreganus* from coastal British Columbia and southern Alaska (Miller  
135 1941; Nolan et al. 2002; Fig. 1A, Fig. 2A, Table 1).

136  
137 The diverse spatial configuration of populations and environmental variability across  
138 the Oregon junco distribution are critical aspects that will affect our capacity to  
139 disentangle the roles of adaptive and neutral factors in explaining genomic variance.  
140 Here we use a conceptual framework to classify into three main settings the distinct  
141 spatial scenarios observable in the Oregon junco with respect to gene flow and  
142 environmental variation. These include (i) geographically isolated populations in similar

143 habitats, as in the case of the Baja California *townsendi* and *pontilis* forms, where low  
144 levels of local adaptation and low rates of gene flow should result in limited adaptive  
145 divergence and high neutral divergence by drift (Fig. 2A); (ii) parapatric populations  
146 under divergent ecological conditions, as exemplified by the *pinosus* and *thurberi* forms  
147 in California, where divergence is expected to increase due to local adaptation, while  
148 geographic proximity and moderate gene flow should lead to intermediate levels of  
149 neutral differentiation by drift (Fig. 2B); and (iii) populations found along a continuous  
150 environmental gradient, as in the northernmost forms of Oregon junco (*thurberi*,  
151 *shufeldti*, *montanus* and *oreganus*) where neutral divergence is expected to be low due  
152 to high levels of gene flow, while local adaptation along the gradient may result in a  
153 pattern of high differentiation in adaptive variation (Fig. 2C).

154

155 Here we use the Oregon junco complex to study how geographic isolation, population  
156 history, and local ecological adaptation have driven population differentiation across the  
157 range, using extensive population sampling and genome-wide SNPs obtained from  
158 ‘genotyping by sequencing’ (GBS, Elshire et al. 2011). A draft consensus genome of  
159 junco has also been sequenced and assembled to be used as a reference. We first assess  
160 patterns of neutral genetic structure across the complex using selectively neutral SNPs,  
161 and we then look for correlations between environmental variables and allele  
162 frequencies across the Oregon junco distribution using redundancy analysis (RDA). We  
163 also use climatic variables to test for significant niche divergence while controlling for  
164 spatial autocorrelation. Finally, we map GBS sequences harboring significant outlier  
165 SNP loci to the zebra finch (*Taeniopygia guttata*) reference genome in order to recover  
166 the chromosomal position of polymorphic sites and explore how adaptive variation is  
167 distributed across the genome.

168

## 169 **Materials and methods**

170

### 171 *Population sampling*

172 Oregon junco populations were sampled across the geographical range of the species  
173 using mist nets in order to obtain biological samples for DNA extraction (Fig. 1A).  
174 Each captured individual was aged, sexed, and marked with a numbered aluminum  
175 band. A blood sample was collected by venipuncture of the sub-brachial vein and stored  
176 in Queen's lysis buffer (Seutin 1991) or absolute ethanol at -80°C in the laboratory. All  
177 sampling activities were conducted in compliance with Animal Care and Use Program  
178 regulations at the University of California Los Angeles, and with state and federal  
179 scientific collecting permits in the USA and Mexico. A high-quality tissue sample for  
180 whole-genome sequencing was obtained from a red-backed junco (*J. hyemalis dorsalis*)  
181 specimen (MLZ 69090) provided by the Moore Laboratory of Zoology, Occidental  
182 College, that was collected at Dude Mountain, Coconino County, Arizona. Genomic  
183 DNA was extracted from blood and tissue samples using a Qiagen DNeasy kit  
184 (Qiagen<sup>TM</sup>, Valencia, CA).

185

### 186 *Whole-genome sequencing and assembly*

187 We assembled a draft dark-eyed junco genome by combining low-coverage genomes of  
188 eight different junco individuals, which we then used as a conspecific reference in the  
189 SNP calling process. Libraries for seven of the genomes were prepared with the Kapa  
190 Library Preparation Kit (Kapa Biosystems, Inc.) using TruSeq-style adapters (Faircloth  
191 and Glenn 2012). They were pooled after random shearing and individual barcoding and  
192 sequenced in a single lane of an Illumina HiSeq platform. The eighth genome was



193 sequenced at a higher coverage by means of two 101-bp paired-end shotgun libraries  
194 and two 101-bp mate-paired libraries with insert sizes of 8 Kb in length at MacroGen  
195 Inc. The TruSeq Nano DNA Kit (Illumina) was used for the preparation of the shotgun  
196 libraries, while the mate-paired libraries were prepared with Nextera Mate Pair Kit  
197 (Illumina). We used FASTQC (Andrews 2010) to evaluate the quality of the sequenced  
198 data, and quality filtering was carried out with NextClip (Leggett et al. 2013) in the case  
199 of the mate paired libraries. For the rest of them we used Trimmomatic (Bolger et al.  
200 2014), applying a sliding window filtering approach with a size of 4 bp and a phred  
201 quality score threshold of 25. We also set a minimum length of 50 bp, below which  
202 reads were filtered out after trimming. We used the software SOAPDENOV02 (Luo et  
203 al. 2012) to perform the assembly. The average insert size for each library was  
204 estimated in a preliminary run, and we set a Kmer size of 27 and minimum edge  
205 coverage of 2. Gaps that emerged during the scaffolding process were removed with the  
206 GapCloser tool from SOAPDENOV02. Finally, we filtered out all the scaffolds shorter  
207 than 500 bp so the genome was functional as a mapping reference. The final assembled  
208 genome had 37,904 scaffolds with an N50 of 147,816 bases, a L50 of 1,951 scaffolds, a  
209 total size of 1.09 Gb, 17.5 Mb of missing sites, and an overall coverage of ~56X, as  
210 computed with VCFTOOLS version 0.1.13 (Danecek et al. 2011).

211

### 212 *Genotyping-by-sequencing*

213 We used genotyping-by-sequencing (Elshire *et al.* 2011) to obtain individual genotypes  
214 from 127 Oregon juncos belonging to the following subspecific taxa: *townsendi* (n=16),  
215 *pontilis* (n=16), *thurberi* (n=35), *pinosus* (n=16), *montanus* (n=16), *shufeldti* (n=12),  
216 *oreganus* (n=16) (Table 1). GBS libraries were prepared and sequenced at Cornell  
217 University's Institute for Genomic Diversity, using the restriction enzyme PstI for

218 digestion. Sequencing of the 127 individually-barcoded libraries was carried out in three  
219 different lanes (along with other 149 junco samples intended for other studies) of an  
220 Illumina HiSeq 2000, resulting in an average of 229.2 million good single-end reads  
221 100 bp in length per lane. Samples of the same form were distributed among at least two  
222 of the lanes to avoid sequencing bias, except in the case of *shufeldti* individuals, which  
223 were all introduced in the last set of sequenced samples.

224

### 225 *Alignment and variant calling*

226 We evaluated GBS read quality using FASTQC after sorting them by individual with  
227 FASTXTOOLKIT (Gordon and Hannon 2010), and performed the trimming and  
228 filtering treatment using PRINSEQ (Schmieder and Edwards 2011). All resulting reads  
229 were 69 bp long and had a mean genotyping phred quality score of at least 30, with no  
230 positions below 20. The reads were then mapped against the assembled junco genome  
231 using the mem algorithm in the Burrows-Wheeler Aligner (BWA, Li and Durbin 2009).  
232 Two samples were excluded at this step due to too low read mapping (1 *thurberi* and 1  
233 *montanus*). We used the Genome Analysis Toolkit (GATK, McKenna et al. 2010)  
234 version 3.6-0 to realign reads around indels using the IndelRealigner tool and then we  
235 applied the HaplotypeCaller tool to call the individual genotypes. We finally used the  
236 GenotypeGVCFs tool to gather all the per-sample GVCFs files generated in the  
237 previous step and produce a set of joint-called SNPs and indels in the variant call format  
238 (*vcf*) (GATK Best Practices, DePristo et al. 2011; Auwera et al. 2013). Because GBS  
239 data do not provide enough coverage for base quality score recalibration, we used  
240 VCFTOOLS to implement a ‘hard filtering’ process, customized for each of the  
241 downstream analyses (Table 2).

242

243 *Genetic structure analyses*

244 To explore genome-wide population structure among all Oregon junco forms, we ran a  
245 principal components analysis (PCA) based on SNP data. Using VCFTOOLS we  
246 retained all samples with less than 25% missing data after a ‘soft filtering’ (coverage  
247 range between 2 and 100, minimum phred quality score of 40), resulting in a dataset of  
248 88 samples, and between 8 and 12 individuals per population (24 in the case of  
249 *thurberi*). We filtered out all the sites with any non-genotyped individuals or a minor  
250 allele frequency (MAF) below 0.02. We also applied a threshold for SNPs showing  
251 highly significant deviations from Hardy-Weinberg equilibrium (HWE) with a p-value  
252 of  $10^{-4}$  to filter out false variants arisen by the alignment of paralogous loci, resulting in  
253 a matrix of 11,261 variants. We then excluded SNPs putatively under selection using  
254 BayeScan (Foll and Gaggiotti 2008). BayeScan computes per-SNP  $F_{ST}$  scores and  
255 decomposes them into a population-specific component shared by all loci that  
256 approximates population related effects, and a locus-specific component shared by all  
257 populations, which accounts for selection. The program compares two models of  
258 divergence, with and without selection, and assumes a departure from neutrality when  
259 the locus-specific component is necessary to explain a given diversity pattern (Foll  
260 2012). We used BayeScan with default settings and a thinning interval size to 100 to  
261 ensure convergence. For each SNP we obtained the posterior probability for the  
262 selection model and the  $F_{ST}$  coefficient averaged over populations. For outlier detection  
263 and exclusion, we implemented a false discovery rate of 0.3. To filter out the SNPs  
264 under linkage disequilibrium (LD) we used the function `snpGdsLDpruning` from the  
265 `SNPrelate` package (Zheng 2012) in R Studio (R Studio Team 2015) version 1.0.136  
266 with R (R Core Team 2013) version 3.2.2. We applied the correlation coefficient  
267 method with a threshold of 0.2 (`method="corr", ld.threshold=0.2`), resulting in a final

268 data matrix of 9,436 SNP loci (Table 2). We then used the function `snpGdsPCA` also  
269 available in `SNPrelate` to perform the PCA and obtain the eigenvectors to be plotted.  
270  
271 We examined population structure with `STRUCTURE` (Pritchard et al. 2000), using a  
272 smaller, more heavily filtered SNP data matrix to reduce the computational time of the  
273 analysis. Using `VCFTOOLS`, we retained the eight samples of each population (16 in  
274 the case of *thurberi*) with the lowest proportion of missing sites for a final number of 64  
275 samples. We constructed a data matrix of biallelic SNPs excluding those out of a range  
276 of coverage between 2 and 100, or with a genotyping phred quality score below 70.  
277 Positions with less than 90% of individuals genotyped were removed from the data  
278 matrix, along with those presenting a MAF below 0.02. Once again, we implemented a  
279 threshold for SNPs showing highly significant deviations from Hardy-Weinberg  
280 equilibrium (HWE) with a p-value of  $10^{-4}$ , and performed the filtering for non-neutral  
281 positions and linkage disequilibrium exactly as done for the PCA, to obtain a final data  
282 matrix of 34,367 SNP loci (Table 2). We converted the *vcf* file to `STRUCTURE` format  
283 using `PGDspider` (Lischer and Excoffier 2012) version 2.0.5.1. Bash scripts to perform  
284 the analyses were created with `STRAUTO` (Chhatre and Emerson 2016) and we ran the  
285 program five times per K, with K ranging from 1 to 10 after running a preliminary  
286 analysis to infer the lambda value. The burn-in was set to 50K iterations and the  
287 analysis ran for an additional 100K iterations. Similarity scores among runs and  
288 graphics were computed with `CLUMPAK` (Kopelman et al. 2015).

289

### 290 *Redundancy analysis and variance partition*

291 When applying GEA methods there are two main potentially confounding effects  
292 related to neutral factors: (i) structure among populations derived from strong drift in

293 isolation may result in genetic patterns similar to those related to adaptive divergence;  
294 and (ii) demographic expansions along latitudinal axes may create gradients of allele  
295 frequencies at neutral loci correlated with latitude, that in turn would correlate with any  
296 environmental variable that changes with latitude, mimicking a pattern of selective  
297 sweep and local adaptation (Excoffier and Ray 2008; Excoffier et al. 2009; Rellstab et  
298 al. 2015; Forester et al. 2016). Redundancy analysis (Van Den Wollenberg 1977;  
299 Legendre and Legendre 1998) is a canonical ordination method that allows computing  
300 the variance of a set of response variables explained by a number of constraining or  
301 explanatory variables. In addition, partial RDA enables computation of this shared  
302 variance between two sets of variables while conditioning or holding constant the  
303 effects of a third set of covariables. Here we used RDA and partial RDA as  
304 implemented in the R package *vegan* (Oksanen et al. 2016) to explore the associations  
305 between genetic variability and environmental data. Ecological data were obtained from  
306 7 of the 19 variables available in the BioClim database (Hijmans et al. 2005),  
307 specifically chosen in accordance to their relevance to junco ecology (Miller 1941;  
308 Nolan et al. 2002). They measured mean temperature and precipitation over the year  
309 (BIO1 and BIO12); mean temperature and precipitation over the warmest quarter  
310 (BIO10 and BIO18), which corresponds to the birds' breeding season; isothermality,  
311 referring to how the range of day-to-night temperature differs from the range of  
312 summer-to-winter, where a value of 100 indicates equality between them; and  
313 seasonality of temperature and precipitation (BIO4 and BIO15). We also included three  
314 vegetation variables from the Moderate Resolution Imaging Spectroradiometer  
315 (MODIS) satellites as available in <https://modis.gsfc.nasa.gov>: percent tree cover  
316 (TREE), Normalized Difference Vegetation Index (NDVI, a measure of canopy  
317 greenness), and NDVI's annual standard deviation (std\_NDVI). Finally, we included

318 the high-quality elevation data provided by the NASA Shuttle Radar Topographic  
319 Mission (ELEV), downloadable from <http://www2.jpl.nasa.gov/srtm> for a total of  
320 eleven variables (Table 3). All ecological variables were centered and standardized.  
321 Following Blanchet et al. (2008), we implemented a forward selection method using the  
322 forward.sel function from the R-package packfor (Dray et al. 2009) to reduce the  
323 number of variables in the model. This procedure applies two stopping criteria: a  
324 significance level for each tested variable, which we set at 0.01; and a maximum limit  
325 for global adjusted  $R^2$ , equal to the adjusted  $R^2$  of the RDA model including all initial  
326 variables. In doing so we prevent inflation of the overall type I error and of the amount  
327 of explained variance. After this, we excluded those retained variables with a variance  
328 inflation factor (VIF) over 10 (Borcard et al. 2011) to avoid high collinearity. Despite  
329 signs of low orthogonality observable among variables in the partial RDA (especially  
330 among BIO18, TREE and NDVI, see Results) we chose not to exclude more variables  
331 or to apply dimension-reduction treatments like PCA to the environmental space of  
332 variables so as to assess their specific and relative contributions to differentiation  
333 patterns (McCormack et al. 2010) and discuss signals of adaptation with higher  
334 confidence. The final selected ecological variables were used as explanatory variables in  
335 two RDAs, with and without subtracting the effects of neutral processes, which were  
336 approximated by the first two principal components of the PCA of population structure  
337 based on selectively neutral loci (see above). As response variables, we used the same  
338 SNP dataset used for the PCA, but excluding LD and neutrality filters. SNP data were  
339 coded as counts of the alternative allele for each position (*i.e.*, 0, 1 or 2 copies) with  
340 VCFTOOLS and transformed following Patterson et al. (2006). Statistical significance  
341 was obtained using a permutation-based procedure with 10,000 permutations, assuming  
342  $\alpha = 0.01$ . We also used variance partitioning as implemented in the vegan R-package to

343 estimate (i) the total proportion of genomic variation explained by ecological variables  
344 alone; (ii) by neutral structure alone; and (iii) the effects of both sets of variables.

345 Finally, we repeated the whole RDA treatment for a subset of 87 SNPs identified as  
346 selectively divergent by BayeScan, with no conditional treatment. The analyses were  
347 conducted in R version 3.2.2 (code included in Appendix I, Supplementary Material).

348

#### 349 *Niche divergence tests*

350 To further explore patterns of ecological divergence in the Oregon Junco, we tested for  
351 niche divergence applying the method developed by McCormack et al. (2010), a method  
352 that allows us to examine each environmental variable separately. To avoid a loss of  
353 statistical power due to multiple analyses, we conducted three specific comparisons of  
354 forms presenting different patterns of genetic divergence and geographical settings,  
355 including: (i) *townsendi* and southern *thurberi* forms, in order to estimate niche  
356 divergence between geographically isolated, genetically differentiated forms; (ii) the  
357 ecologically divergent *pinosus* with the parapatric northern *thurberi* form, to further test  
358 a possible case of isolation-by-adaptation; and (iii) northern and southern populations of  
359 *thurberi*, as conspecific extremes of a potential adaptive gradient. We used occurrence  
360 points from our own georeferenced field sampling records, and this set of occurrence  
361 records was further revised to avoid spatial autocorrelation and to match the spatial  
362 resolution of environmental variables (1-km grid). Our final dataset comprised 80  
363 localities: *pinosus* (n = 14), *thurberi* north (n = 26), *thurberi* south (n = 19), and  
364 *townsendi* (n = 21). We decided to improve quality (geographic accuracy) vs. quantity  
365 (number of occurrence records), by using fewer data but with higher spatial accuracy  
366 (Engler et al. 2004). To generate a background dataset for each population, we drew  
367 1000 random points from a background representing the geographic range of each junco

368 population. In order to select an appropriately sized area for the niche divergence tests,  
369 we included accessible habitats according to the dispersal ability of each population  
370 (Soberon and Peterson 2005). We generated background samples from a 100-km  
371 “buffer zone” around known occurrences (Warren et al. 2008). For populations with  
372 small ranges or small dispersal ability (*thurberi* south, *pontilis* and *townsendi*) we  
373 restricted the buffer zone to 10 km to reduce spatial inaccuracies in the null distribution  
374 (Barve et al. 2011), after testing different buffer sizes to test the robustness in delimiting  
375 accessible areas for juncos. Next, we extracted the environmental data (same as the data  
376 used for the RDA, see above) for both occurrence points and random background points  
377 from within the geographic range of each junco form. Niche divergence and  
378 conservatism were tested by comparing the observed environmental differences among  
379 forms against a null model of background divergence (generated by calculating the  
380 difference between background points using a bootstrapping approach and 1000  
381 resamples) for each environmental variable using a two-tailed test. We conducted all the  
382 analyses in R 3.2.2.

383

#### 384 *Genome scans*

385 We performed genome scans for different Oregon junco forms using BayeScan.  
386 In order to obtain the chromosomal positions of the SNPs, we mapped the GBS reads  
387 against the zebra finch (*Taeniopygia guttata*) genome v87 available in Ensembl (Yates  
388 et al. 2016), applying the same set of tools and parameters as for mapping against the  
389 junco genome. Using the same set of samples as in the PCA and the RDA, we  
390 conducted the analysis for all forms together; for *townsendi* against *pontilis*; and for  
391 *townsendi* against all *thurberi* (see Table 2 for final dataset sizes). For each of these  
392 matrices, we retained only biallelic SNPs with coverage between 2 and 100 and a



393 genotyping phred quality score over 40. Positions with less than 25% of the individuals  
394 genotyped were removed from each data matrix, along with those presenting a MAF  
395 below 0.05. Once again, we implemented a p-value threshold for HWE of  $10^{-4}$  to filter  
396 out false variants arisen by the alignment of paralogous loci. We ran BayeScan with the  
397 same settings used for filtering out SNPs under selection in population structure  
398 analyses, but implemented a more conservative 10% FDR for outlier detection. Genome  
399 scan plots were conducted in R 3.2.2 using the package qqman (Turner 2014).

400

401

## 402 **Results**

403

### 404 *Neutral genetic structure*

405 The plot of the first two principal components from the PCA revealed four distinct  
406 clusters in the Oregon junco group. The most differentiated groups were *townsendi* and  
407 *pontilis* from Baja California, which formed two highly divergent clusters with respect  
408 to each other and to other populations. A third, highly differentiated group corresponded  
409 to *pinosus* from coastal California, showing less differentiation than the Baja California  
410 forms with respect to a fourth cluster, which included all the remaining forms in the  
411 PCA (Fig. 1B). Within this fourth cluster, southern *thurberi* individuals presented  
412 certain degree of differentiation from the rest of the forms, a pattern more conspicuous  
413 when plotting the third and fourth components, which also revealed a slight signal of  
414 divergence in the *oreganus* form (Fig. S1 in Supplementary Information).

415

416 The STRUCTURE results were generally congruent with the PCA. The  $K = 2$  plot  
417 recovered *townsendi* as an independent population, which shared a considerable amount

418 of variance with *pontilis*. In the analysis for  $K = 3$ , *pontilis* separated, and  $K = 4$   
419 identified the same four main clusters seen in the PC1 vs. PC2 plot (Fig. 1B), revealing  
420 *pinosus* as an independent genetic cluster. The plot for  $K = 5$  clearly captured the  
421 differentiation of the southern *thurberi* form in a fifth cluster, and in  $K=6$ , *oreganus*  
422 appears as an independent northern group with all individuals from northern *thurberi*  
423 and especially *montanus* and *shufeldti* forms showing an increasing probability of  
424 assignment to the *oreganus* cluster from south to north (Fig. 2).

425

426 Patterns of divergence in Nei's distances and  $F_{ST}$  values among forms were highly  
427 congruent with previous results, with *townsendi*, *pontilis* and *pinosus* showing the  
428 highest values for both indices, and northern forms showing lower levels of  
429 differentiation, especially between southern and northern *thurberi* individuals (Table  
430 S1).

431

#### 432 *Forward selection of explanatory variables*

433 Out of eleven potentially relevant ecological variables for juncos, six were retained after  
434 the forward selection method intended for excluding non-significant effects. Retained  
435 variables included isothermality (BIO3), mean temperature of the warmest quarter  
436 (BIO10), mean precipitation of the warmest quarter (BIO18), vegetation cover (TREE),  
437 greenness (NDVI), and elevation (ELEV) (Table 3). None of these variables was  
438 excluded due to excessive correlation as VIF values were below 10 (maximum  
439 recovered VIF = 5.75).

440

#### 441 *Redundancy analysis and variance partition*

442 All six ecological variables retained in the forward selection method were included as  
443 explanatory variables in the RDA and the partial RDA models. RDA computes, in  
444 successive order, a series of axes that are linear combinations of the explanatory  
445 variables, and that best explain the variation in the matrix of response variables  
446 (Borcard et al. 2011). Six RDA axes (named RDA1 to RDA6 hereafter, ordered by the  
447 amount of variance explained by each one, as reflected by the adjusted  $R^2$ ) explained  
448 6.26% of the total genetic variance in the non-conditioned model, and 1.18% when  
449 removing the effects of neutral genetic structure (Table 4). The amount of explained  
450 variance increased to 36.61% when using only BayeScan outliers as response variables  
451 (Table 4, Table S2). The permutation tests for the RDA models yielded a p-value below  
452 0.001 in all three analyses, confirming the significance of the constraining variable  
453 effects.

454

455 Loadings of ecological explanatory variables on each of the axes varied across the three  
456 different RDA models (Fig 4, Table 4, Table S2). In the non-conditioned RDA, the  
457 RDA1 axis had a large negative contribution of TREE and NDVI, and loaded positively  
458 on elevation (Fig. 4A). The RDA2 axis loaded mostly on BIO3 and BIO10. The plot of  
459 per-individual projections on these two axes revealed a pattern generally similar to the  
460 PCA. The forms *townsendi*, *pontilis* and to a lesser extent *pinosus*, showed distinctive  
461 high values of correlation with both axes. The remaining forms showed similar  
462 correlation patterns with respect to RDA1, with southern *thurberi* individuals showing a  
463 clear association with RDA2 (Fig. 4A).

464

465 In the partial RDA, RDA1 had a large contribution of BIO3, while RDA2 loaded mostly  
466 on BIO10 and to a lesser extent, BIO18 and TREE (Fig. 4B). Plotting these first two

467 RDA axes revealed patterns of genetic correlation especially related to the first RDA  
468 axis for *pinosus*, which consequently presented the strongest association with  
469 isothermality. The individuals from the southern population of *thurberi* showed a more  
470 pronounced negative association with RDA2 than in the non-conditioned RDA, further  
471 evidence of a positive correlation with mean temperature of the warmest quarter.  
472 Northern forms of the Oregon junco (northern *thurberi*, *shufeldti*, *montanus* and  
473 *oreganus*) also separated along the second RDA axis, with the northernmost *oreganus*  
474 showing the strongest association with the particularly conspicuous mean precipitation  
475 of the warmest quarter gradient, a pattern that was not visible in the non-conditioned  
476 RDA. *Townsendi* from Baja California occupied positions closer to the origin of  
477 coordinates, suggesting a lower association between environmental and genetic variance  
478 (Fig. 4B).

479

480 In the RDA based on outlier loci potentially under selection, the first axis showed  
481 moderate negative contributions from TREE and NDVI, and also a positive contribution  
482 of ELEV (Fig. 4C). Variance in BIO18 was almost entirely captured by RDA2, which  
483 also had a relatively high, negative contribution from BIO3. The plot showed a pattern  
484 of correlation between *pontilis* and *townsendi* along RDA1, while genetic variance in  
485 *oreganus* appeared strongly associated with the gradient of mean precipitation of the  
486 warmest quarter along RDA2. The rest of Oregon junco forms (and one atypical  
487 *oreganus* individual) were distributed in an opposite fashion, with small differences in  
488 their patterns of correlation with environmental variability captured in the second axis  
489 of the RDA (Fig. 4C).

490

491 The variance partition analysis showed that climate and neutral structure together  
492 explained 7.17% of the total genetic variability (fractions A+B+C, Fig. 5). Since  
493 variable sets are not orthogonal, a 5.08% of variation was explained jointly by the  
494 environmental data and the first two components of the PCA based on neutral genetic  
495 positions (fraction B, Fig. 5). As recovered in the partial RDA, environmental variables  
496 alone explained 1.18% of the total variance (fraction A, Fig. 5), while the non-  
497 overlapping fraction of neutral genetic structure explained 0.91% of the variability in  
498 the SNP dataset (fraction C, Fig. 5). The p-value computed through the 10,000-step  
499 permutation test for each individual fraction was below 0.001 in all cases, thus  
500 confirming the significant effects of both variable sets.

501

#### 502 *Niche divergence tests*

503 We tested for niche divergence and conservatism on each of the environmental  
504 variables. We found significant niche divergence between *pinosus* and northern *thurberi*  
505 for three of the six environmental variables analyzed (isothermality, mean precipitation  
506 of the warmest quarter and elevation; Table 5). When considering northern *thurberi* vs.  
507 southern *thurberi*, we found significant divergence for mean temperature of the warmest  
508 quarter and conservatism for isothermality (Table 5). NDVI was the only variable that  
509 exhibited significant divergence between *townsendi* and *thurberi* south (Table 5).

510

#### 511 *Genome scans*

512 The BayeScan survey comparing all Oregon junco forms together detected 32 SNPs  
513 potentially under divergent selection, and 5 significant SNPs potentially under  
514 balancing selection. In the two pairwise comparisons *townsendi* vs. *pontilis* and  
515 *townsendi* vs. *thurberi*, 20 and 30 significant SNPs with signs of having diverged under

516 selection were detected, respectively, and no significant SNPs under balancing selection  
517 were found in either case. SNPs potentially differentiated under divergent selection  
518 appeared distributed across the genome in all comparisons, without obvious signs of  
519 heterogeneity among regions (Fig. 6). Chromosomes 1B and 16 harbored no SNPs so  
520 they are not shown in the plot.

521

522

## 523 **Discussion**

524

525 *Neutral population structure and local adaptation explains genomic variance among*  
526 *Oregon junco forms*

527 Our results reveal that both neutral and selective factors have played a role in driving  
528 divergence among Oregon junco populations, and that the relative contributions of  
529 geographic isolation and environment-driven selection are not uniform across the  
530 distribution range of the complex. Environmental variables explained 1.18% of genomic  
531 variation when controlling for population structure, and environment and neutral  
532 structure together accounted for 7.17% of the variability in the 11,256 SNP matrix. The  
533 remaining 92.83% of the variance corresponds potentially to loci under balancing  
534 selection or selective pressures not represented in our ecological variables, and to  
535 neutral variation shared by all Oregon junco forms because of their close relatedness  
536 and/or gene flow among them. The amount of variance explained solely by  
537 environmental variables in our study was comparable to the values reported in studies  
538 applying RDA to detect specific correlations between genomic variation and a given set  
539 of potentially correlated variables, as shown in plants (e.g. Lasky et al. 2012; Vincent et  
540 al. 2013; De Kort et al. 2014) or other avian species (Safran et al. 2016; Szulkin et al.

541 2016). Previous studies on birds have used simple spatial variables such as geographic  
542 distance to control for the effects of spatial autocorrelation (Safran et al. 2016; Szulkin  
543 et al. 2016). Here, we controlled for genome-wide patterns of neutral variation by  
544 subtracting the variance captured by the first two PCs of a PCA based on neutral  
545 genome-wide SNPs, a method which should better account for population history and  
546 structure, including changes in effective population size, geographic isolation and  
547 related effects (Forester et al. 2016). Since spatial autocorrelation is usually reflected by  
548 neutral genetic structure, we did not include spatial covariates to avoid over-  
549 conditioning the model (Rellstab et al. 2015). Given that only a small fraction of the  
550 surveyed genome is expected to be related to genes coding for climatic adaptation or  
551 linked to them (Meirmans 2015), a significant 1.18% of association between genomic  
552 variation and environmental variability in the conditioned (partial) RDA over only  
553 11,261 genome-wide distributed SNPs is a compelling signal of local adaptation.

554

555 *Genetic-environment association patterns in the diversification of the Oregon junco*

556 The RDA revealed a number of strikingly different patterns of covariation between  
557 genetic variance and ecological variables likely to have played a role in Oregon junco  
558 diversification, especially when the effects of population history were removed. The  
559 forms *pontilis* and *townsendi* from Baja California, markedly isolated in terms of  
560 geography and neutral genetic variability, presented a low genetic-environment  
561 association when controlling for population history. This suggests that the  
562 differentiation between *townsendi* and *pontilis* is due largely to geographic isolation, in  
563 this case caused by unsuitable desert habitat in the lowlands surrounding their  
564 respective mountain ranges, a pattern also known as isolation by resistance (IBR,  
565 McRae and Beier 2007). In this scenario, our results suggest that differentiation is

566 caused by drift under conditions of small population size and reduced gene flow, rather  
567 than divergent selection due to local adaptation, fitting the classic allopatric speciation  
568 model (Mayr 1942, 1963; Coyne and Orr 2004). This hypothesis is consistent with the  
569 niche divergence test comparing *townsendi* with southern *thurberi*, for which all tested  
570 variables but NDVI showed no signal of divergence beyond expectations based on  
571 background divergence.

572

573 The form *pinosus* showed considerable neutral genetic structure and a conspicuous  
574 pattern of genetic-environment association in both non-conditioned and partial RDA.  
575 When controlling for population structure, *pinosus* individuals showed high positive  
576 correlation values with isothermality, while correlating negatively with elevation.  
577 Indeed, *pinosus* presents the highest isothermality values, and the second lowest  
578 elevation after *oreganus*, reflecting a tolerance for low elevation conditions that are  
579 absent in neighboring *thurberi*, a pattern also recovered in the niche divergence test.  
580 Unlike other differentiated forms like *pontilis* and *townsendi*, *pinosus* does not show  
581 high geographic isolation, and zones of intergradation with *thurberi* have been  
582 described (Miller 1941). Neutral population divergence despite the absence of  
583 geographic barriers to gene flow along with signs of local adaptation is a pattern  
584 consistent with isolation-by-adaptation, where barriers to gene flow may have arisen as  
585 individuals adapted to the distinct habitat of the coastal mountains of California. Niche  
586 distinctiveness and the genetic-environment association pattern of this form is thus  
587 congruent with a combination of warm latitude, low elevation and coastal influence that  
588 has seemingly resulted in the adaptive differentiation of *pinosus* from the rest of the  
589 Oregon junco taxa. As a result, differentiation by drift may have led to positive  
590 correlations between adaptive and neutral genetic divergence (Nosil et al. 2008).



591

592 The southern *thurberi* individuals from Mount Laguna showed high overlap in terms of  
593 neutral genetic structure with northern *thurberi* and other boreal forms, and only slight  
594 differences in their genetic-environment association patterns when no controls for  
595 confounding factors were implemented. The Mount Laguna site represents the  
596 southernmost tip of the *thurberi* range in Southern California, which extends northward  
597 and reaches Oregon, forming a relatively continuous distribution (Miller 1941; Nolan et  
598 al. 2002), suggesting potentially high gene flow. However, the partial RDA revealed a  
599 distinctive pattern of high correlation with the mean temperature of the warmest quarter  
600 for the southern *thurberi* juncos, differentiating them from the rest of Oregon forms.  
601 They also correlated negatively with the mean precipitation of the warmest quarter. This  
602 pattern seems congruent with the habitat of Mount Laguna, and in general with the  
603 southern inland range of Oregon juncos, quite arid during summer but subject to  
604 snowfalls in winter due to the high elevations (Miller 1941), contrasting sharply with  
605 the more climatically moderate coastal and northern populations. The limited neutral  
606 genetic structure between *thurberi* range extremes but considerable differentiation in the  
607 genetic-environment association patterns is consistent with a process of local adaptation  
608 across a selective gradient (Forester et al. 2016), in which selection is the prominent  
609 evolutionary force driving differentiation (Haldane 1948; Slatkin 1973; Nagylaki 1975;  
610 Felsenstein 1976) while neutral alleles may move freely across space. The niche  
611 divergence test comparing southern and northern *thurberi* populations was significant  
612 for mean temperature of the warmest quarter.

613

614 The boreal Oregon junco forms including *oreganus*, *montanus*, *shufeldti*, and *thurberi*  
615 individuals from Tahoe, California, presented a more conspicuous pattern of local

616 adaptation along a shallow selective gradient. These forms showed very low neutral  
617 genetic structure or differences in ecological covariances in the non-conditioned RDA,  
618 yet showed an increasing signal of association following their latitudinal distribution in  
619 the partial RDA. A strong association pattern emerged especially for mean precipitation  
620 of the warmest quarter and for correlated environmental variables of tree cover and  
621 greenness, matching quite precisely their latitudinal distribution along a gradient of  
622 increasing humidity and vegetation cover. The ecology-related differences in genetic  
623 variance, consistent with the taxonomic classification of these forms, is especially  
624 relevant considering the relative phenotypic similarity of these taxa, and their apparent  
625 intergradation (Miller 1941; Nolan et al. 2002).

626

627 GEA methods present a number of limitations, including potentially high rates of type I  
628 error (see Supplementary Materials for details). Here, rather than detecting specific loci  
629 under selection, we aimed to explore how selection and neutral processes shape the  
630 variability in Oregon juncos, but the risk of finding false significant associations  
631 between genetic variance and ecological parameters persists. To further test the  
632 environmental associations revealed in this study, we implemented a highly  
633 conservative approach using only BayeScan outliers as response variables in the model.  
634 The non-conditioned RDA based on 87 SNP loci identified by BayeScan as potential  
635 targets of divergent selection yielded relatively lower resolution than the partial RDA.  
636 BayeScan has been shown to produce relatively few false positives, but it is also a  
637 conservative approach, the sensitivity of which decreases with selection strength  
638 (Narum and Hess 2011). The RDA suggests that BayeScan correctly identified outliers  
639 related to low temperatures and high precipitation for *oreganus* samples, a pattern  
640 congruent with the habitat and with the outcomes of previous analyses for this form. It

641 also detected highly differentiated positions in *pontilis* and *townsendi* that correlate with  
642 RDA1, but in this case associations with specific environmental variables were lower,  
643 and the pattern disappears in the RDA based on the entire SNP dataset when correcting  
644 for population structure. This may suggest that BayeScan failed to exclude the effects of  
645 demographic history, or in turn, that controlling for the genetic variance captured by the  
646 PCA was overly conservative. BayeScan was also less successful in detecting adaptive  
647 divergence in *pinosus*, and especially in northern Oregon junco forms, where selection  
648 may be weaker or have acted during a shorter period. Nevertheless, the outlier SNP  
649 dataset explained 36.61% of the total climatic variability, a considerable amount  
650 compared with the full SNP data RDA models, indicating a good fit of the retained  
651 outliers to the linear regression on the environmental parameters.

652

653 *Interactions among environment, geography and demographic processes result in three*  
654 *different modes of divergence within the Oregon junco lineage*

655 The Oregon junco is one of the six phenotypically and genetically differentiated dark-  
656 eyed junco taxa evolved during a northward expansion from Central America after the  
657 last glacial maximum, c.a. 18,000 years ago (Milá et al. 2007; Friis et al. 2016). Similar  
658 postglacial expansions have been reported for many other bird species (Seutin et al.  
659 1995; Milá et al. 2000; 2006; Hansson et al. 2008; Malpica and Ornelas 2014; Alvarez  
660 et al. 2015). However, the population structure documented in this study reveals a  
661 variety of different spatial, selective and demographic factors not previously  
662 documented in other avian taxa. In light of our genetic-environment association  
663 analyses, the patterns recovered by the PCA and STRUCTURE analysis reveal at least  
664 three different effects of geography and demographic history interacting to varying  
665 degrees with selection in the process of Oregon junco diversification. First, the IBR

666 pattern of differentiation presented by *pontilis* and *townsendi* may suggest that these  
667 forms are peripheral remnants of an original, broader distribution of the Oregon juncos,  
668 thereafter isolated in ‘sky islands’ of Baja California and diverging predominantly by  
669 drift. Indeed, in his thorough monograph on the geographic variation in juncos, Alden  
670 Miller (1941) had perceptively suggested early on that the habitat of Oregon juncos  
671 from Baja California did not seem to account for their phenotypic differentiation from  
672 Californian forms, and that their distinctive traits appeared to be predominantly  
673 “historical” (p. 306). The spatial configuration and recovered patterns of neutral and  
674 adaptive divergence for *pontilis* and *townsendi* fit the first model of neutral divergence  
675 of isolated population in approximately similar habitats (scenario A in Fig. 2). Second,  
676 the IBA pattern found in *pinosus* suggests that the current area of intergradation  
677 corresponds to a secondary contact zone that formed after diverging in relative isolation,  
678 maybe linked to the ancient coastal closed-cone pine forest that has allegedly  
679 diminished since the Pleistocene (Miller 1941). The mode of divergence between  
680 parapatric populations in different habitats (scenario B in Fig. 2) has been only partially  
681 fulfilled, since local adaptation seems to have resulted in reduced levels of gene flow,  
682 leading to increased neutral genome-wide differentiation (Nosil et al. 2008; Funk et al.  
683 2011; Flaxman et al. 2014). Third, the geographic continuum represented by *thurberi*,  
684 *shufeldti*, *montanus* and *oreganus* is also captured in the STRUCTURE analysis by a  
685 gradual signal of differentiation following a latitudinal distribution, suggesting that  
686 ongoing gene flow may occur among forms. Combined with the signal of increasing  
687 environmental association recovered in the partial RDA, these outcomes are consistent  
688 with a process of differentiation driven by local adaptation along a selective gradient in  
689 the direction of the northward expansion, fulfilling the third hypothesized mode of  
690 divergence for these forms of Oregon junco (scenario C in Fig. 2). Interestingly,

691 ecological association approaches have been shown to perform better along clines of  
692 selection where demographic expansions align with the gradient of ecological variables,  
693 usually related to latitude (Frichot et al. 2015), as is the case in the *Junco* system.

694

695 A relevant aspect of the marked population structure found among Oregon junco forms  
696 is that it is based on a relatively small subset of genome-wide SNPs randomly sampled  
697 from across the genome, representing a genomic fraction not greater than 0.2% of the  
698 total of 1.2 Gb. The clear signal of divergence mediated by environmental factors  
699 recovered also in the RDA indicates that divergence may have taken place at the level  
700 of the entire genome, suggesting the role of multiple selective pressures during local  
701 adaptation along the latitudinally broad and heterogeneous distribution of the Oregon  
702 juncos. The presence of outliers potentially under positive selection scattered across the  
703 genome seems to support this hypothesis of selection-driven genome-wide divergence,  
704 rather than widespread drift among isolated populations. Other examples of such  
705 patterns of genomic differentiation due to divergent selection at early (e.g. Parchman et  
706 al. 2013; Brawand et al. 2014; Egan et al. 2015) and intermediate (e.g. Riesch et al.  
707 2017) stages of speciation have been reported recently, contrasting with proposed  
708 models of speciation initiated by divergent selection in a few, localized genes involved  
709 in reproductive isolation (e.g. Nadeau et al. 2012; Poelstra et al. 2014).

710

711

## 712 **Conclusion**

713 Our analyses reveal the role of both local adaptation and demography in driving rapid  
714 diversification during the northward recolonization of western North America by the  
715 Oregon junco. The combined effects of a demographic expansion along a selective

716 gradient with a heterogeneous landscape of environmental variability have resulted in a  
717 striking array of divergence modes within a single lineage, from isolated forms in Baja  
718 California that have differentiated largely by drift in isolated ‘sky islands’, to adaptive  
719 diversification along selective gradients with no obvious geographic barriers to gene  
720 flow. There is also a compelling example of isolation by adaptation in the case of  
721 *pinosus*, where ecological barriers to gene flow seem to maintain its divergence with  
722 respect to nearby forms. Genome-wide patterns of divergence indicate that Oregon  
723 junco diversification has been driven by multiple ecological factors acting on many loci  
724 across the genome, and suggests that selection may promote local adaptation in short  
725 periods of time, highlighting the role of adaptive divergence in the early stages of the  
726 speciation process. Future analyses of dense sequencing and functional gene  
727 characterization will be necessary to further identify adaptive changes promoting  
728 barriers to gene flow and reveal the genomic architecture of rapid diversification.

729

730

### 731 **Acknowledgements**

732 We thank Pau Aleixandre, Jonathan Atwell, Elena Berg, Setefilla Buenavista, Steve  
733 Burns, Jatziri Calderón, Adrián Gutiérrez, Alfonsina Hernández, Fritz Hertel, Ellen  
734 Ketterson, Adán Oliveras de Ita, César Ríos, Sahid Robles, Vicente Rodríguez, Whitney  
735 Tsai, Rich Van Buskirk and Alvar Veiga for invaluable help in the field and lab. We are  
736 also grateful to Yoann Anselmetti, Clémentine Francois, Rachel Johnston, Etienne  
737 Kornobis, Benoit Nabholz, Sergio Nigenda, Jacqueline Robinson, Marjolaine Rouselle  
738 and Robert K. Wayne for their assistance with bioinformatic analyses. We also thank  
739 Laura Barrios and Luis M. Carrascal for reviewing the statistical analyses and providing

740 orientation. Funding was provided by grant CGL-2011-25866 from the Spanish  
741 Ministry of Science and Innovation to BM.

742

743 **Data Accessibility**

744 Genomic data will be deposited in Dryad in short.

745

746 **Author Contributions**

747 G. Friis and BM designed the study and carried out field sampling; G. Friis, JM, and BF  
748 generated and analyzed genomic data; G. Friis, G. Fandos and AZ generated and  
749 analyzed environmental data; G. Friis and BM wrote the manuscript with input from all  
750 co-authors.

751

752

753 **Table 1.** Oregon junco forms and number of genotyped individuals per locality. State

754 abbreviations are the following: British Columbia (BC) in Canada; Oregon (OR),

755 California (CA) in the USA; Baja California Norte (BCN) in Mexico.

756

| <i>Form</i>              | <i>State</i> | <i>Localities</i>                          | <i>Sequenced</i> |
|--------------------------|--------------|--------------------------------------------|------------------|
| <i>oreganus</i>          | BC           | Banks Island, Porcher Island, Susan Island | 16               |
| <i>shufeldti</i>         | OR           | Willamette N.F.                            | 12               |
| <i>montanus</i>          | OR           | Wallowa N.F.                               | 16               |
| <i>northern thurberi</i> | CA           | Tahoe                                      | 18               |
| <i>southern thurberi</i> | CA           | Mount Laguna                               | 17               |
| <i>pinosus</i>           | CA           | Santa Cruz Mountains                       | 16               |
| <i>pontilis</i>          | BCN          | Sierra Juárez                              | 16               |
| <i>townsendi</i>         | BCN          | Sierra San Pedro Mártir                    | 16               |
| Total                    |              |                                            | 127              |

757

758



759 **Table 2.** SNP data matrices used in each analyses. General filters included a depth  
 760 range from 2 to 100 and a p-value for Hardy-Weinberg deviation of  $10^{-4}$ .

761

| <b>Analysis</b>                      | <b>Number of samples</b> | <b>Min. phred score</b> | <b>MAF threshold</b> | <b>Number of SNPs</b> | <b>Allowed missing data</b> |
|--------------------------------------|--------------------------|-------------------------|----------------------|-----------------------|-----------------------------|
| STRUCTURE                            | 64                       | 70                      | 0.02                 | 34,367                | 10%                         |
| PCA                                  | 88                       | 40                      | 0.02                 | 9,436                 | 0%                          |
| <b>RDA:</b>                          |                          |                         |                      |                       |                             |
| On all <i>loci</i>                   | 88                       | 40                      | 0.02                 | 11,261                | 0%                          |
| On BayeScan outliers                 | 88                       | 40                      | 0.02                 | 87                    | 0%                          |
| <b>Genome Scans:</b>                 |                          |                         |                      |                       |                             |
| All lineages                         | 88                       | 40                      | 0.02                 | 29,868                | 75%                         |
| <i>townsendi</i> vs. <i>pontilis</i> | 24                       | 40                      | 0.05                 | 22,773                | 75%                         |
| <i>townsendi</i> vs. <i>thurberi</i> | 24                       | 40                      | 0.05                 | 22,516                | 75%                         |

762

763

764 **Table 3.** Set of environmental variables included in the initial stepforward selection

765 method. Significant variables retained by the method are shown in bold.

766

| Environmental variable | Description                                                      |
|------------------------|------------------------------------------------------------------|
| BIO1                   | Annual mean temperature                                          |
| <b>BIO3</b>            | <b>Isothermality</b>                                             |
| BIO4                   | Temperature seasonality (standard deviation *100)                |
| <b>BIO10</b>           | <b>Mean temperature of the warmest quarter</b>                   |
| BIO12                  | Annual precipitation                                             |
| BIO15                  | Precipitation seasonality (coefficient of variation)             |
| <b>BIO18</b>           | <b>Precipitation of the warmest quarter</b>                      |
| <b>NDVI</b>            | <b>Normalized Difference Vegetation Index (greenness)</b>        |
| NDVI SD                | Annual NDVI standard deviation (greenness seasonality)           |
| <b>TREE</b>            | <b>Percent tree cover</b>                                        |
| <b>ELEV</b>            | <b>Elevation from the NASA Shuttle Radar Topographic Mission</b> |

767

768 **Table 4.** RDA loads of the constraining variables in the first two axes and their  
 769 explained variance for each one of the RDA models. The total variance explained by the  
 770 full model (adjusted R<sup>2</sup> for the resultant six axes) is shown for each analysis. In all of  
 771 the three analyses, the p-value for the full models was below 0.001. See Table 3 for  
 772 variable definitions.  
 773

|                                                          | <b>Non conditioned RDA</b> |         | <b>Partial RDA</b> |         | <b>RDA of BayeScan outliers</b> |        |
|----------------------------------------------------------|----------------------------|---------|--------------------|---------|---------------------------------|--------|
| <b>Total explained variance (adjusted R<sup>2</sup>)</b> | 6.26%                      |         | 1.18%              |         | 36.61%                          |        |
| <b>Variable</b>                                          | RDA1                       | RDA2    | RDA1               | RDA2    | RDA1                            | RDA2   |
| BIO3                                                     | 0.124                      | 0.239   | 0.839              | -0.427  | 0.214                           | 0.763  |
| BIO10                                                    | 0.108                      | -0.610  | 0.359              | -0.679  | 0.221                           | 0.374  |
| BIO18                                                    | 0.052                      | 0.021   | -0.452             | 0.501   | -0.031                          | -0.994 |
| ELEV                                                     | 0.646                      | -0.031  | -0.324             | -0.301  | 0.629                           | 0.420  |
| NDVI                                                     | -0.641                     | 0.588   | -0.320             | 0.199   | -0.731                          | -0.277 |
| TREE                                                     | -0.710                     | 0.320   | -0.270             | 0.326   | -0.776                          | -0.423 |
| <b>Variance</b>                                          |                            |         |                    |         |                                 |        |
| Eigenvalue                                               | 1304.262                   | 567.705 | 481.320            | 350.714 | 63.655                          | 12.657 |
| Proportion explained                                     | 0.025                      | 0.011   | 0.003              | 0.002   | 0.250                           | 0.050  |
| Cumulative proportion                                    | 0.025                      | 0.037   | 0.003              | 0.005   | 0.250                           | 0.300  |

774

775

776 **Table 5.** Results from the niche divergence test for *pinosus* vs. northern *thurberi*,  
 777 northern vs. southern *thurberi* and southern *thurberi* vs. *townsendi*. Variables showing  
 778 significant divergence (Diverged) or conservatism (Conserved) are shown in bold (p-  
 779 value < 0.05). e.d.b.b.: expected divergence based on background.

780

|                          | Variable     | Result           | p-value      | Observed mean difference | Background mean difference |
|--------------------------|--------------|------------------|--------------|--------------------------|----------------------------|
| <i>pinosus</i> vs.       | TREE         | e.d.b.b.         | 0.636        | 3.95                     | 7.17                       |
| northern <i>thurberi</i> | BIO10        | e.d.b.b.         | 0.718        | 20.40                    | 17.34                      |
|                          | <b>BIO3</b>  | <b>Diverged</b>  | <b>0.000</b> | <b>16.78</b>             | <b>9.45</b>                |
|                          | <b>BIO18</b> | <b>Diverged</b>  | <b>0.000</b> | <b>41.92</b>             | <b>27.24</b>               |
|                          | <b>ELEV</b>  | <b>Diverged</b>  | <b>0.032</b> | <b>1329.81</b>           | <b>978.26</b>              |
|                          | NDVI         | e.d.b.b.         | 0.550        | 192.67                   | 428.18                     |
| northern vs.             | TREE         | e.d.b.b.         | 0.580        | 2.11                     | 4.52                       |
| southern <i>thurberi</i> | <b>BIO10</b> | <b>Diverged</b>  | <b>0.030</b> | <b>41.85</b>             | <b>23.87</b>               |
|                          | <b>BIO3</b>  | <b>Conserved</b> | <b>0.002</b> | <b>1.37</b>              | <b>2.87</b>                |
|                          | BIO18        | e.d.b.b.         | 0.860        | 15.02                    | 14.25                      |
|                          | ELEV         | e.d.b.b.         | 0.474        | 202.60                   | 140.29                     |
|                          | NDVI         | e.d.b.b.         | 0.144        | 258.89                   | 1019.97                    |
| southern <i>thurberi</i> | TREE         | e.d.b.b.         | 0.536        | 15.01                    | 12.25                      |
| vs. <i>townsendi</i>     | BIO10        | e.d.b.b.         | 0.412        | 47.88                    | 43.03                      |
|                          | BIO3         | e.d.b.b.         | 0.472        | 2.47                     | 2.89                       |
|                          | BIO18        | e.d.b.b.         | 0.188        | 74.77                    | 67.26                      |
|                          | ELEV         | e.d.b.b.         | 0.786        | 750.22                   | 717.21                     |
|                          | <b>NDVI</b>  | <b>Diverged</b>  | <b>0.012</b> | <b>1597.62</b>           | <b>574.28</b>              |

781

782

783

784 **Figure 1.** Geographic distribution and neutral genetic structure of the Oregon junco  
785 forms. (A) Breeding ranges of all the Oregon junco forms. (B) Genetic structure of  
786 Oregon junco forms based on a principal components analysis of independent,  
787 selectively neutral genome-wide SNPs.

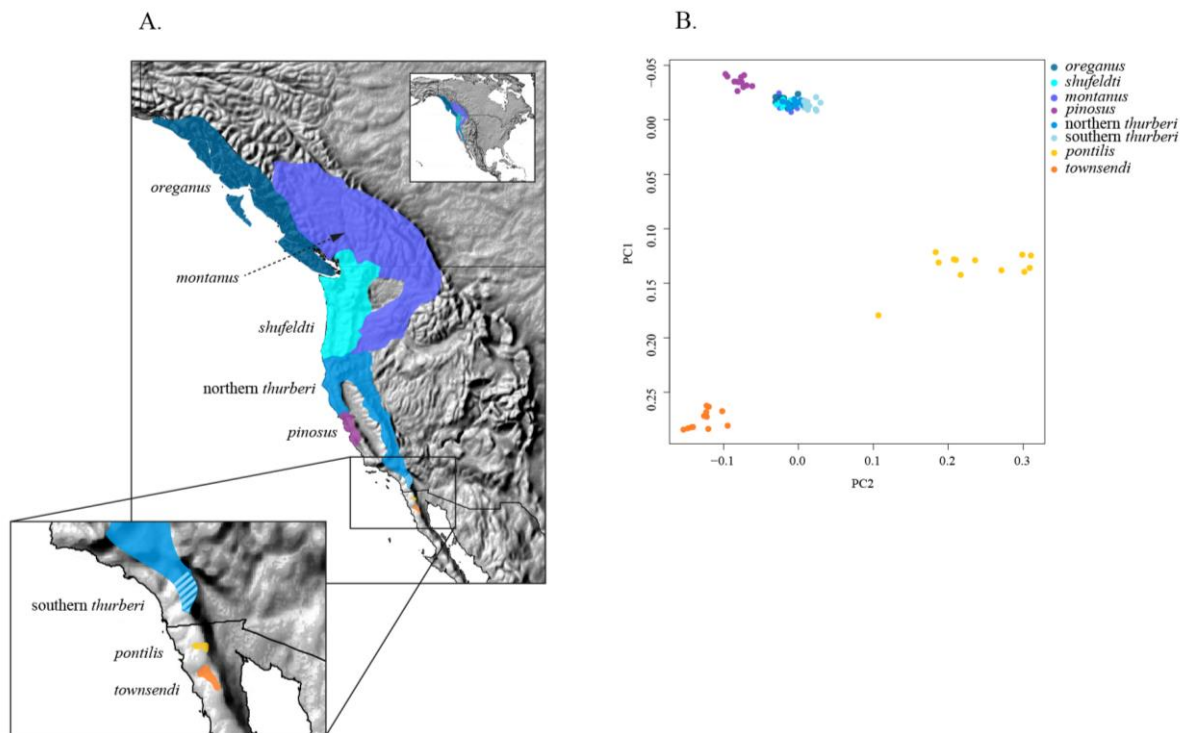

788

789

790

791 **Figure 2.** Expectations for neutral and adaptive divergence under different  
792 environmental and spatial configurations found across the Oregon junco distribution.  
793 (A) Geographically isolated populations in similar habitats. (B) Parapatric populations  
794 in ecologically divergent habitats. (C) Population continuum across a selective gradient.

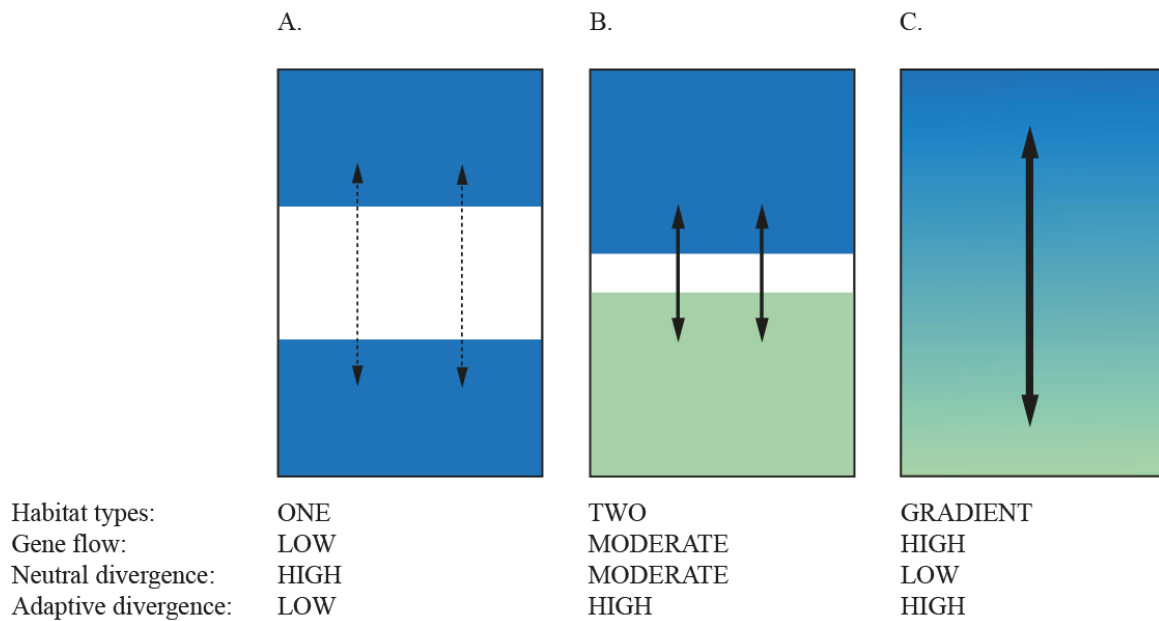

795

796

797 **Figure 3.** Genetic structure of the Oregon junco forms based on 34,367 selectively  
798 neutral genome-wide SNPs using the program STRUCTURE. Each horizontal bar  
799 corresponds to an individual, with colors corresponding to posterior assignment  
800 probabilities to each of a number of genetic clusters (K). Colors correspond  
801 approximately to those in Fig. 2A.

802

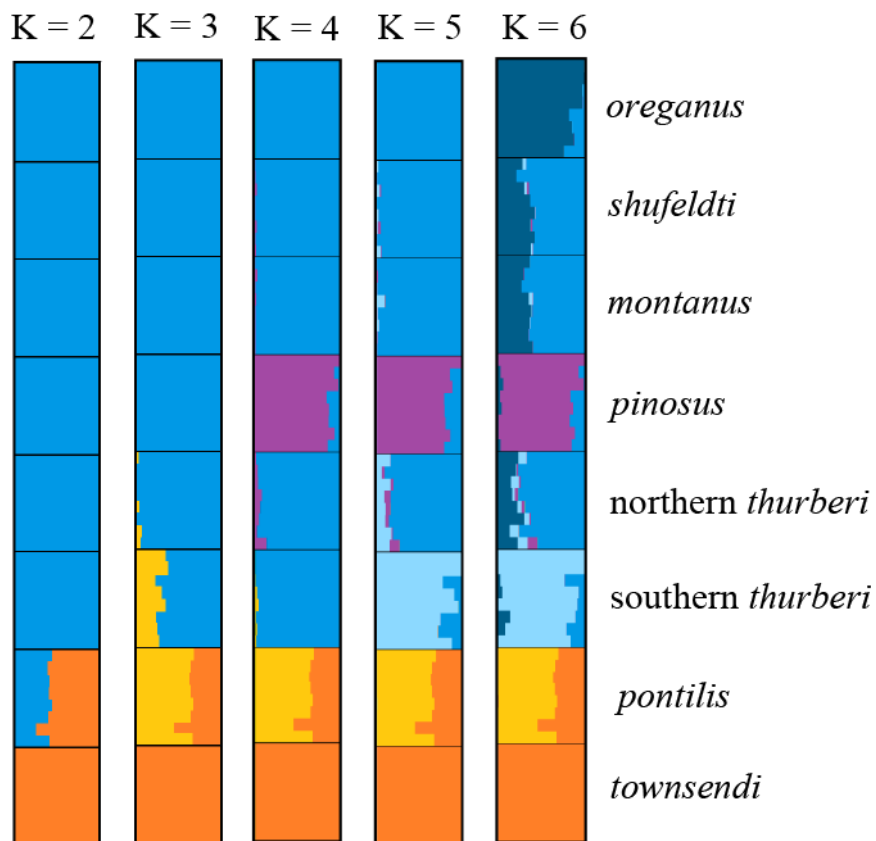

803

804

805

806 **Figure 4.** Genetic-environment association analyses in the Oregon junco. Points  
807 represent the projection of individual genotypes on the first two RDA axes. Marker  
808 colors correspond to those on the range map on Fig. 2A. The explanatory variables are  
809 shown within the space defined by RDA1 and RDA2 by labeled vectors. Their  
810 contribution to each axis is represented by the length of their orthogonal projections  
811 over the scale bars along top and right sides of the graphs. Arrows indicate the direction  
812 of the gradient of variation for the corresponding environmental parameter. The value  
813 for each sample point on each explanatory variable can be obtained by an orthogonal  
814 projection on the corresponding plotted vector. (A) First two RDA axes of a non-  
815 conditioned RDA based on 11,261 SNPs. (B) First two RDA axes of a partial RDA  
816 based on 11,261 SNPs conditioned by neutral genetic structure, approximated by the  
817 first two PCs of a PCA based on neutral markers. (C) First two RDA axes of a non-  
818 conditioned RDA based on 87 SNP outliers identified in a BayeScan analysis.

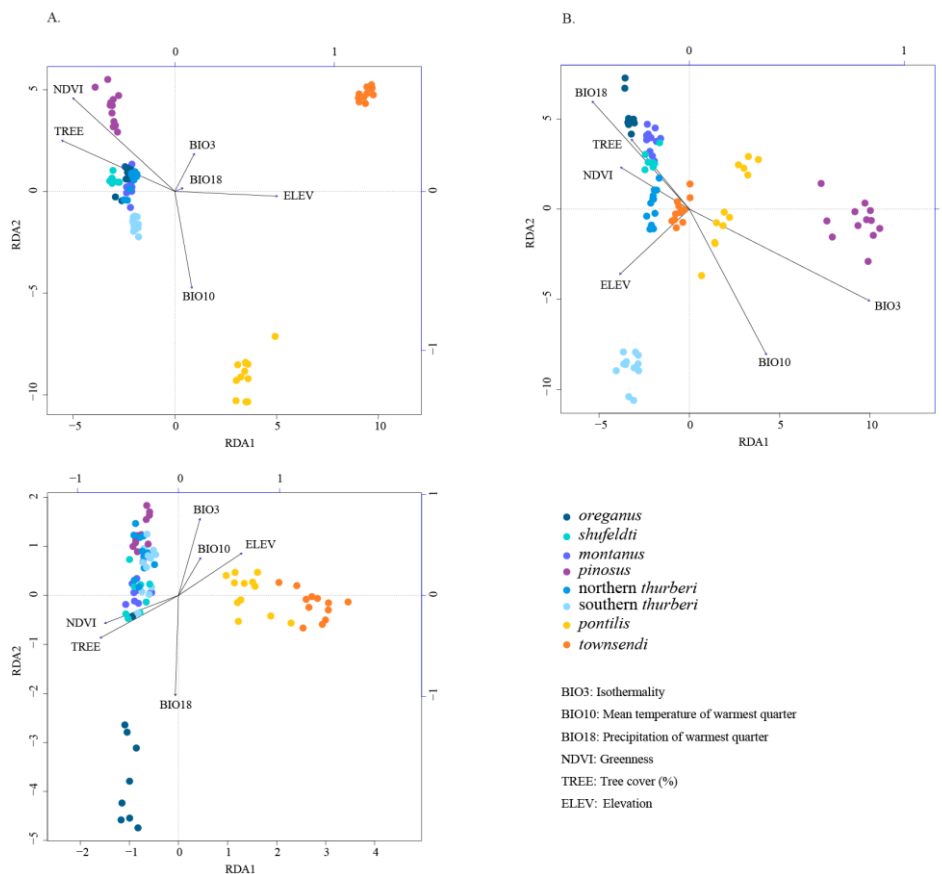

819



820 **Figure 5.** Plot of the fractions of the genetic variability in Oregon samples explained by  
821 (A) environmental variables alone; (B) the overlap of both environmental variables and  
822 neutral structure; and (C) neutral genetic structure alone; and the unexplained genetic  
823 variability (residuals). P-values computed through a 1000-step permutation test for the  
824 fractions A, B and C, were below 0.001 in all cases.  
825

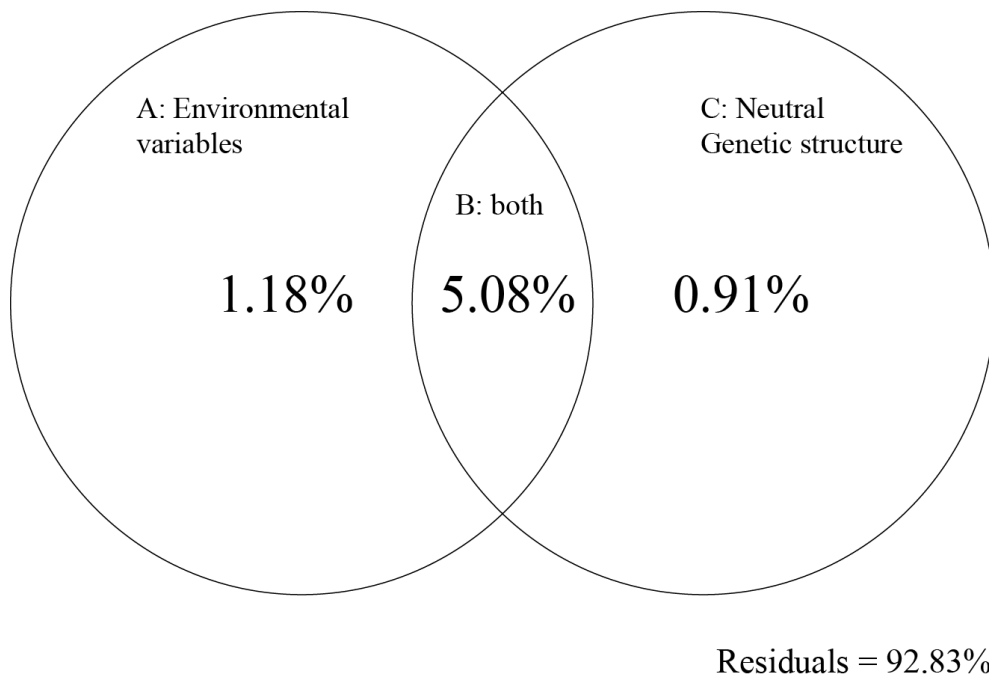

826

827

828 **Figure 6.** Plot of per-SNP posterior probability of divergence mediated by selection  
829 (shown as 1 – Q-value as computed by BayeScan) in (A) all Oregon junco forms  
830 together; (B) *townsendi* against *pontilis* and (C) *townsendi* against all *thurberi*. Loci  
831 above the dotted line (in red) are those below a false discovery rate of 10%.  
832

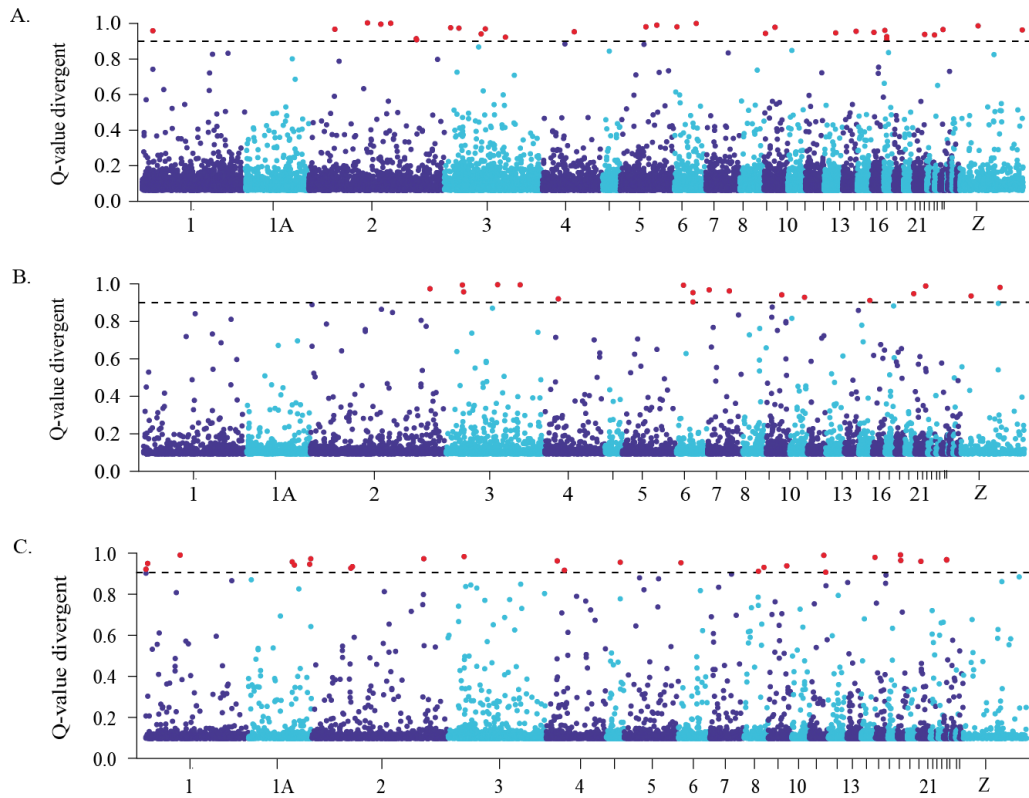

833

834

835 **References**

- 836 Alvarez, S., J. F. Salter, J. E. McCormack, and B. Milá. 2015. Speciation in mountain  
837 refugia: phylogeography and demographic history of the pine siskin and black-  
838 capped siskin complex. *Journal of Avian Biology* 47:335-345.
- 839 Andrews, S. 2010. FastQC: a quality control tool for high throughput sequence data.
- 840 Auwera, G. A., M. O. Carneiro, C. Hartl, R. Poplin, G. del Angel, A. Levy-Moonshine,  
841 T. Jordan, K. Shakir, D. Roazen, and J. Thibault. 2013. From FastQ data to high-  
842 confidence variant calls: the genome analysis toolkit best practices pipeline.  
843 *Current protocols in bioinformatics*:11.10. 11-11.10. 33.
- 844 Barve, N., V. Barve, A. Jiménez-Valverde, A. Lira-Noriega, S. P. Maher, A. T.  
845 Peterson, J. Soberón, and F. Villalobos. 2011. The crucial role of the accessible  
846 area in ecological niche modeling and species distribution modeling. *Ecological*  
847 *Modelling* 222:1810-1819.
- 848 Bierne, N., J. Welch, E. Loire, F. Bonhomme, and P. David. 2011. The coupling  
849 hypothesis: why genome scans may fail to map local adaptation genes.  
850 *Molecular Ecology* 20:2044-2072.
- 851 Billiard, S., T. Lenormand, and S. Gavrillets. 2005. Evolution of migration under kin  
852 selection and local adaptation. *Evolution* 59:13-23.
- 853 Blanchet, F. G., P. Legendre, and D. Borcard. 2008. Forward selection of explanatory  
854 variables. *Ecology* 89:2623-2632.
- 855 Bolger, A. M., M. Lohse, and B. Usadel. 2014. Trimmomatic: a flexible trimmer for  
856 Illumina sequence data. *Bioinformatics*:btu170.
- 857 Borcard, D., F. Gillet, and P. Legendre. 2011. Chapter 6. Canonical Ordination. Pp.  
858 153-226. *Numerical Ecology with R*. Springer.

- 859 Brawand, D., C. E. Wagner, Y. I. Li, M. Malinsky, I. Keller, S. Fan, O. Simakov, A. Y.  
860 Ng, Z. W. Lim, and E. Bezault. 2014. The genomic substrate for adaptive  
861 radiation in African cichlid fish. *Nature* 513:375.
- 862 Carson, H. L. 1975. The genetics of speciation at the diploid level. *The American*  
863 *Naturalist* 109:83-92.
- 864 Chhatre, V. and K. Emerson. 2016. StrAuto: Automation and parallelization of  
865 STRUCTURE analysis. See <http://strauto.popgen.org>.
- 866 Christmas, M. J., E. Biffin, M. F. Breed, and A. J. Lowe. 2016. Finding needles in a  
867 genomic haystack: targeted capture identifies clear signatures of selection in a  
868 nonmodel plant species. *Molecular Ecology* 25:4216-4233.
- 869 Coyne, J. A. and H. A. Orr. 2004. *Speciation*. Sinauer Associates, Inc., Sunderland,  
870 Massachusetts.
- 871 Danecek, P., A. Auton, G. Abecasis, C. A. Albers, E. Banks, M. A. DePristo, R. E.  
872 Handsaker, G. Lunter, G. T. Marth, and S. T. Sherry. 2011. The variant call  
873 format and VCFtools. *Bioinformatics* 27:2156-2158.
- 874 Darwin, C. 1859. *The origin of species by means of natural selection, or the*  
875 *preservation of favoured races in the struggle for life*. John Murray, London.
- 876 De Kort, H., K. Vandepitte, H. H. Bruun, D. Closset-Kopp, O. Honnay, and J. Mergeay.  
877 2014. Landscape genomics and a common garden trial reveal adaptive  
878 differentiation to temperature across Europe in the tree species *Alnus glutinosa*.  
879 *Molecular ecology* 23:4709-4721.
- 880 DePristo, M. A., E. Banks, R. Poplin, K. V. Garimella, J. R. Maguire, C. Hartl, A. A.  
881 Philippakis, G. Del Angel, M. A. Rivas, and M. Hanna. 2011. A framework for  
882 variation discovery and genotyping using next-generation DNA sequencing data.  
883 *Anglais* 43:491-498.

- 884 Dray, S., P. Legendre, and G. Blanchet. 2009. packfor: Forward Selection with  
885 permutation. R package version 0.0-7/r58.
- 886 Dwight, J. 1918. The geographical distribution of color and of other variable characters  
887 in the genus *Junco*: a new aspect of specific and subspecific values. Bull. Am  
888 Mus. Nat. Hist. 38:269-309.
- 889 Edmonds, C. A., A. S. Lillie, and L. L. Cavalli-Sforza. 2004. Mutations arising in the  
890 wave front of an expanding population. Proceedings of the National Academy of  
891 Sciences of the United States of America 101:975-979.
- 892 Egan, S. P., G. J. Ragland, L. Assour, T. H. Powell, G. R. Hood, S. Emrich, P. Nosil,  
893 and J. L. Feder. 2015. Experimental evidence of genome-wide impact of  
894 ecological selection during early stages of speciation-with-gene-flow. Ecology  
895 letters 18:817-825.
- 896 Elshire, R. J., J. C. Glaubitz, Q. Sun, J. A. Poland, K. Kawamoto, E. S. Buckler, and S.  
897 E. Mitchell. 2011. A Robust, Simple Genotyping-by-Sequencing (GBS)  
898 Approach for High Diversity Species. PLoS ONE 6:e19379.
- 899 Engler, R., A. Guisan, and L. Rechsteiner. 2004. An improved approach for predicting  
900 the distribution of rare and endangered species from occurrence and pseudo-  
901 absence data. Journal of applied ecology 41:263-274.
- 902 Excoffier, L., T. Hofer, and M. Foll. 2009. Detecting loci under selection in a  
903 hierarchically structured population. Heredity 103:285-298.
- 904 Excoffier, L. and N. Ray. 2008. Surfing during population expansions promotes genetic  
905 revolutions and structuration. Trends in ecology & evolution 23:347-351.
- 906 Faircloth, B. C. and T. C. Glenn. 2012. Not all sequence tags are created equal:  
907 designing and validating sequence identification tags robust to indels. PloS one  
908 7:e42543.

- 909 Faria, R., S. Renaut, J. Galindo, C. Pinho, J. Melo-Ferreira, M. Melo, F. Jones, W.  
910 Salzburger, D. Schluter, and R. Butlin. 2014. Advances in Ecological  
911 Speciation: an integrative approach. *Molecular ecology* 23:513-521.
- 912 Felsenstein, J. 1976. The theoretical population genetics of variable selection and  
913 migration. *Annual review of genetics* 10:253-280.
- 914 Flaxman, S. M., A. C. Wacholder, J. L. Feder, and P. Nosil. 2014. Theoretical models  
915 of the influence of genomic architecture on the dynamics of speciation.  
916 *Molecular ecology* 23:4074-4088.
- 917 Foll, M. 2012. Bayescan v2. 1 user manual. *Ecology* 20:1450-1462.
- 918 Foll, M. and O. E. Gaggiotti. 2008. A genome scan method to identify selected loci  
919 appropriate for both dominant and codominant markers: A Bayesian perspective.  
920 *Genetics* 180:977-993.
- 921 Forester, B. R., M. R. Jones, S. Joost, E. L. Landguth, and J. R. Lasky. 2016. Detecting  
922 spatial genetic signatures of local adaptation in heterogeneous landscapes.  
923 *Molecular ecology* 25:104-120.
- 924 Forester, B. R., J. R. Lasky, H. H. Wagner, and D. L. Urban. 2017. Comparing methods  
925 for detecting multilocus adaptation with multivariate genotype-environment  
926 associations. *bioRxiv*.
- 927 Frichot, E., S. D. Schoville, P. de Villemereuil, O. E. Gaggiotti, and O. François. 2015.  
928 Detecting adaptive evolution based on association with ecological gradients:  
929 orientation matters! *Heredity* 115:22-28.
- 930 Friis, G., P. Aleixandre, R. Rodríguez-Estrella, A. G. Navarro-Sigüenza, and B. Milá.  
931 2016. Rapid postglacial diversification and long-term stasis within the songbird  
932 genus *Junco*: phylogeographic and phylogenomic evidence. *Molecular Ecology*  
933 25:6175-6195.

- 934 Funk, D. J., S. P. Egan, and P. Nosil. 2011. Isolation by adaptation in *Neochlamisus* leaf  
935 beetles: host-related selection promotes neutral genomic divergence. *Molecular*  
936 *Ecology* 20:4671-4682.
- 937 Gordon, A. and G. Hannon. 2010. Fastx-toolkit. FASTQ/A short-reads preprocessing  
938 tools (unpublished) [http://hannonlab.cshl.edu/fastx\\_toolkit](http://hannonlab.cshl.edu/fastx_toolkit).
- 939 Haldane, J. B. 1948. The theory of a cline. *Journal of genetics* 48:277-284.
- 940 Hansson, B., D. Hasselquist, M. Tarka, P. Zehindjiev, and S. Bensch. 2008. Postglacial  
941 colonisation patterns and the role of isolation and expansion in driving  
942 diversification in a passerine bird. *PLoS One* 3:e2794.
- 943 Hedrick, P. W., M. E. Ginevan, and E. P. Ewing. 1976. Genetic polymorphism in  
944 heterogeneous environments. *Annual review of Ecology and Systematics* 7:1-32.
- 945 Hijmans, R. J., S. E. Cameron, J. L. Parra, P. G. Jones, and A. Jarvis. 2005. Very high  
946 resolution interpolated climate surfaces for global land areas. *International*  
947 *Journal of Climatology* 25:1965-1978.
- 948 Jones, M. R., B. R. Forester, A. I. Teufel, R. V. Adams, D. N. Anstett, B. A. Goodrich,  
949 E. L. Landguth, S. Joost, and S. Manel. 2013. Integrating landscape genomics  
950 and spatially explicit approaches to detect loci under selection in clinal  
951 populations. *Evolution* 67:3455-3468.
- 952 Kawecki, T. J. and D. Ebert. 2004. Conceptual issues in local adaptation. *Ecology*  
953 *letters* 7:1225-1241.
- 954 Kopelman, N. M., J. Mayzel, M. Jakobsson, N. A. Rosenberg, and I. Mayrose. 2015.  
955 Clumpak: a program for identifying clustering modes and packaging population  
956 structure inferences across K. *Molecular ecology resources* 15:1179-1191.

- 957 Lasky, J. R., D. L. Des Marais, J. McKAY, J. H. Richards, T. E. Juenger, and T. H.  
958 Keitt. 2012. Characterizing genomic variation of *Arabidopsis thaliana*: the roles  
959 of geography and climate. *Molecular Ecology* 21:5512-5529.
- 960 Legendre, P. and L. Legendre. 1998. Numerical ecology: second English edition.  
961 Developments in environmental modelling 20.
- 962 Leggett, R. M., B. J. Clavijo, L. Clissold, M. D. Clark, and M. Caccamo. 2013.  
963 NextClip: an analysis and read preparation tool for Nextera Long Mate Pair  
964 libraries. *Bioinformatics*:btt702.
- 965 Li, H. and R. Durbin. 2009. Fast and accurate short read alignment with Burrows–  
966 Wheeler transform. *Bioinformatics* 25:1754-1760.
- 967 Lischer, H. E. L. and L. Excoffier. 2012. PGDSpider: an automated data conversion tool  
968 for connecting population genetics and genomics programs. *Bioinformatics*  
969 28:298-299.
- 970 Luo, R., B. Liu, Y. Xie, Z. Li, W. Huang, J. Yuan, G. He, Y. Chen, Q. Pan, and Y. Liu.  
971 2012. SOAPdenovo2: an empirically improved memory-efficient short-read de  
972 novo assembler. *Gigascience* 1:18.
- 973 Malpica, A. and J. F. Ornelas. 2014. Postglacial northward expansion and genetic  
974 differentiation between migratory and sedentary populations of the broad-tailed  
975 hummingbird (*Selasphorus platycercus*). *Molecular Ecology* 23:435-452.
- 976 Manthey, J. D. and R. G. Moyle. 2015. Isolation by environment in white-breasted  
977 nuthatches (*Sitta carolinensis*) of the Madrean Archipelago sky islands: a  
978 landscape genomics approach. *Molecular Ecology* 24:3628-3638.
- 979 Mayr, E. 1942. Systematics and the origin of species. Columbia Univ. Press, New York.
- 980 Mayr, E. 1947. Ecological factors in speciation. *Evolution*:263-288.
- 981 Mayr, E. 1954. Change of genetic environment and evolution.



- 982 Mayr, E. 1963. Animal species and evolution. Belknap Press, Cambridge, MA.
- 983 McCormack, J. E., S. M. Hird, A. J. Zellmer, B. C. Carstens, and R. T. Brumfield. 2013.
- 984 Applications of next-generation sequencing to phylogeography and
- 985 phylogenetics. *Molecular Phylogenetics and Evolution* 66:526-538.
- 986 McCormack, J. E., A. J. Zellmer, and L. L. Knowles. 2010. Does Niche Divergence
- 987 Accompany Allopatric Divergence in Aphelocoma Jays as Predicted Under
- 988 Ecological Speciation?: Insights from Tests with Niche Models. *Evolution*
- 989 64:1231-1244.
- 990 McKenna, A., M. Hanna, E. Banks, A. Sivachenko, K. Cibulskis, A. Kernytsky, K.
- 991 Garimella, D. Altshuler, S. Gabriel, and M. Daly. 2010. The Genome Analysis
- 992 Toolkit: a MapReduce framework for analyzing next-generation DNA
- 993 sequencing data. *Genome research* 20:1297-1303.
- 994 McRae, B. H. and P. Beier. 2007. Circuit theory predicts gene flow in plant and animal
- 995 populations. *Proceedings of the National Academy of Sciences* 104:19885-
- 996 19890.
- 997 Meirmans, P. G. 2015. Seven common mistakes in population genetics and how to
- 998 avoid them. *Molecular Ecology* 24:3223-3231.
- 999 Milá, B., P. Aleixandre, S. Alvarez-Nordström, J. McCormack, E. Ketterson, and J.
- 1000 Atwell. 2016. More than meets the eye: Lineage diversity and evolutionary
- 1001 history of Dark-eyed and Yellow-eyed juncos. *Snowbird: Integrative Biology*
- 1002 and Evolutionary Diversity in the Junco (ED Ketterson and JW Atwell, Editors).
- 1003 University of Chicago Press, Chicago, Illinois, USA:179-198.
- 1004 Milá, B., D. J. Girman, M. Kimura, and T. B. Smith. 2000. Genetic evidence for the
- 1005 effect of a postglacial population expansion on the phylogeography of a North

- 1006 American songbird. Proceedings of the Royal Society Biological Sciences Series  
1007 B 267:1033-1040.
- 1008 Milá, B., J. E. McCormack, G. Castaneda, R. K. Wayne, and T. B. Smith. 2007. Recent  
1009 postglacial range expansion drives the rapid diversification of a songbird lineage  
1010 in the genus *Junco*. Proceedings of the Royal Society B-Biological Sciences  
1011 274:2653-2660.
- 1012 Milá, B., T. B. Smith, and R. K. Wayne. 2006. Postglacial population expansion drives  
1013 the evolution of long-distance migration in a songbird. *Evolution* 60:2403-2409.
- 1014 Miller, A. 1941. Speciation in the avian genus *Junco*. University of California  
1015 Publications in Zoology 44:173-434.
- 1016 Mitton, J., Y. Linhart, J. Hamrick, and J. Beckman. 1977. Observations on the genetic  
1017 structure and mating system of ponderosa pine in the Colorado Front Range.  
1018 *Theoretical and Applied Genetics* 51:5-13.
- 1019 Nadeau, N. J., A. Whibley, R. T. Jones, J. W. Davey, K. K. Dasmahapatra, S. W.  
1020 Baxter, M. A. Quail, M. Joron, R. H. ffrench-Constant, M. L. Blaxter, J. Mallet,  
1021 and C. D. Jiggins. 2012. Genomic islands of divergence in hybridizing  
1022 *Heliconius* butterflies identified by large-scale targeted sequencing.  
1023 *Philosophical Transactions of the Royal Society B: Biological Sciences*  
1024 367:343-353.
- 1025 Nadeau, S., P. G. Meirmans, S. N. Aitken, K. Ritland, and N. Isabel. 2016. The  
1026 challenge of separating signatures of local adaptation from those of isolation by  
1027 distance and colonization history: The case of two white pines. *Ecology and*  
1028 *evolution* 6:8649-8664.
- 1029 Nagylaki, T. 1975. Conditions for the existence of clines. *Genetics* 80:595-615.

- 1030 Narum, S. R. and J. E. Hess. 2011. Comparison of FST outlier tests for SNP loci under  
1031 selection. *Molecular Ecology Resources* 11:184-194.
- 1032 Nolan, V. J., E. D. Ketterson, D. A. Cristol, C. M. Rogers, E. D. Clotfelter, R. C. Titus,  
1033 S. J. Schoech, and E. Snajdr. 2002. Dark-eyed Junco (*Junco hyemalis*) in A.  
1034 Poole, and F. Gill, eds. *The Birds of North America. The Birds of North*  
1035 *America, Inc., Philadelphia, Pennsylvania.*
- 1036 Nosil, P. 2012. *Ecological Speciation.* Oxford University Press.
- 1037 Nosil, P., S. P. Egan, and D. J. Funk. 2008. Heterogeneous genomic differentiation  
1038 between walking-stick ecotypes: “isolation by adaptation” and multiple roles for  
1039 divergent selection. *Evolution* 62:316-336.
- 1040 Ojeda Alayon, D. I., C. K. Tsui, N. Feau, A. Capron, B. Dhillon, Y. Zhang, S.  
1041 Massoumi Alamouti, C. K. Boone, A. L. Carroll, and J. E. Cooke. 2017. Genetic  
1042 and genomic evidence of niche partitioning and adaptive radiation in mountain  
1043 pine beetle fungal symbionts. *Molecular Ecology* 26:2077-2091.
- 1044 Oksanen, J., F. Blanchet, R. Kindt, P. Legendre, and R. O’Hara. 2016. *Vegan:*  
1045 *community ecology package.* R Packag. 2.3-5.
- 1046 Parchman, T., Z. Gompert, M. Braun, R. Brumfield, D. McDonald, J. Uy, G. Zhang, E.  
1047 Jarvis, B. Schlinger, and C. Buerkle. 2013. The genomic consequences of  
1048 adaptive divergence and reproductive isolation between species of manakins.  
1049 *Molecular Ecology* 22:3304-3317.
- 1050 Patterson, N., A. L. Price, and D. Reich. 2006. Population structure and eigenanalysis.  
1051 *PLoS genet* 2:e190.
- 1052 Poelstra, J. W., N. Vijay, C. M. Bossu, H. Lantz, B. Ryll, I. Müller, V. Baglione, P.  
1053 Unneberg, M. Wikelski, M. G. Grabherr, and J. B. W. Wolf. 2014. The genomic

- 1054 landscape underlying phenotypic integrity in the face of gene flow in crows.  
1055 Science 344:1410-1414.
- 1056 Pritchard, J. K. and A. Di Rienzo. 2010. Adaptation—not by sweeps alone. Nature  
1057 Reviews Genetics 11:665-667.
- 1058 Pritchard, J. K., M. Stephens, and P. Donnelly. 2000. Inference of population structure  
1059 using multilocus genotype data. Genetics 155:945-959.
- 1060 R\_Core\_Team. 2013. R: a language and environment for statistical computing. R  
1061 Foundation for Statistical Computing, Vienna, Austria.
- 1062 R\_Studio\_Team. 2015. RStudio: Integrated Development for R. R Studio, Inc., Boston,  
1063 MA.
- 1064 Rellstab, C., F. Gugerli, A. J. Eckert, A. M. Hancock, and R. Holderegger. 2015. A  
1065 practical guide to environmental association analysis in landscape genomics.  
1066 Molecular Ecology 24:4348-4370.
- 1067 Riesch, R., M. Muschick, D. Lindtke, R. Villoutreix, A. A. Comeault, T. E. Farkas, K.  
1068 Lucek, E. Hellen, V. Soria-Carrasco, and S. R. Dennis. 2017. Transitions  
1069 between phases of genomic differentiation during stick-insect speciation. Nature  
1070 Ecology & Evolution 1:0082.
- 1071 Rundle, H. and P. Nosil. 2005. Ecological speciation. Ecology Letters 8:336-352.
- 1072 Safran, R., E. Scordato, M. Wilkins, J. K. Hubbard, B. Jenkins, T. Albrecht, S.  
1073 Flaxman, H. Karaardıç, Y. Vortman, and A. Lotem. 2016. Genome-wide  
1074 differentiation in closely related populations: the roles of selection and  
1075 geographic isolation. Molecular Ecology 25:3865-3883.
- 1076 Schluter, D. 2000. The ecology of adaptive radiation. Oxford University Press, Oxford.
- 1077 Schmieder, R. and R. Edwards. 2011. Quality control and preprocessing of  
1078 metagenomic datasets. Bioinformatics 27:863-864.

- 1079 Seutin, G. 1991. Preservation of avian blood and tissue samples for DNA analyses.  
1080 Canadian Journal of Zoology 69:82-90.
- 1081 Seutin, G., L. M. Ratcliffe, and P. T. Boag. 1995. Mitochondrial DNA homogeneity in  
1082 the phenotypically diverse redpoll finch complex (Aves: Carduelinae: *Carduelis*  
1083 *flammea-hornemanni*). Evolution 49:962-973.
- 1084 Slatkin, M. 1973. Gene flow and selection in a cline. Genetics 75:733-756.
- 1085 Soberon, J. and A. T. Peterson. 2005. Interpretation of models of fundamental  
1086 ecological niches and species' distributional areas.
- 1087 Sork, V. L., K. Squire, P. F. Gugger, S. E. Steele, E. D. Levy, and A. J. Eckert. 2016.  
1088 Landscape genomic analysis of candidate genes for climate adaptation in a  
1089 California endemic oak, *Quercus lobata*. American journal of botany 103:33-46.
- 1090 Szulkin, M., P. A. Gagnaire, N. Bierne, and A. Charmantier. 2016. Population genomic  
1091 footprints of fine-scale differentiation between habitats in Mediterranean blue  
1092 tits. Molecular ecology 25:542-558.
- 1093 Templeton, A. R. 1981. Mechanisms of speciation-a population genetic approach.  
1094 Annual review of Ecology and Systematics 12:23-48.
- 1095 Termignoni-García, F., J. P. Jaramillo-Correa, J. Chablé-Santos, M. Liu, A. J. Shultz, S.  
1096 V. Edwards, and P. Escalante Pliego. 2017. Genomic footprints of adaptation in  
1097 a cooperatively breeding tropical bird across a vegetation gradient. Molecular  
1098 Ecology.
- 1099 Turner, S. D. 2014. qqman: an R package for visualizing GWAS results using QQ and  
1100 manhattan plots. bioRxiv:005165.
- 1101 Uyeda, J. C., S. J. Arnold, P. A. Hohenlohe, and L. S. Mead. 2009. Drift promotes  
1102 speciation by sexual selection. Evolution 63:583-594.

- 1103 Van Den Wollenberg, A. L. 1977. Redundancy analysis an alternative for canonical  
1104 correlation analysis. *Psychometrika* 42:207-219.
- 1105 Vincent, B., M. Dionne, M. P. Kent, S. Lien, and L. Bernatchez. 2013. Landscape  
1106 genomics in Atlantic salmon (*Salmo salar*): searching for gene–environment  
1107 interactions driving local adaptation. *Evolution* 67:3469-3487.
- 1108 Wang, I. J. and G. S. Bradburd. 2014. Isolation by environment. *Molecular Ecology*  
1109 23:5649-5662.
- 1110 Warren, D. L., R. E. Glor, and M. Turelli. 2008. Environmental Niche Equivalency  
1111 Versus Conservatism: Quantitative Approaches to Niche Evolution. *Evolution*  
1112 62:2868-2883.
- 1113 Wright, S. 1943. Isolation by distance. *Genetics*. 28:114-138.
- 1114 Wright, S. 1946. Isolation by distance under diverse systems of mating. *Genetics* 31:39.
- 1115 Yates, A., W. Akanni, M. R. Amode, D. Barrell, K. Billis, D. Carvalho-Silva, C.  
1116 Cummins, P. Clapham, S. Fitzgerald, and L. Gil. 2016. Ensembl 2016. *Nucleic*  
1117 *acids research*:gkv1157.
- 1118 Zheng, X. 2012. SNPRelate: parrallel computing toolset for genome-wide association  
1119 studies. R package version 95.
- 1120
- 1121
